# Supplementary material for: Elicitation of Roots and AC-DC with PEP-13 Peptide Shows Differential Defense Responses in Multi-Omics
Source: Cells. 2022 Aug 21;11(16):2605. doi: 10.3390/cells11162605 (PMC9406913; doi:10.3390/cells11162605)
Supplement: Supplementary file 1 [file cells-11-02605-s001.zip › 220720 Data supp tables.xlsx]

## Sheet: Table S1
Bin name	ID	Annotation	Log2 (FC)
Cell wall proteins AGPs	GLYMA_03G179900	FAS1 domain-containing protein	2.65
Cell wall proteins AGPs	GLYMA_13G293500	FAS1 domain-containing protein	3.64
Cell wall proteins AGPs	GLYMA_14G005300	FAS1 domain-containing protein	0.87
Cell wall proteins HRGP	GLYMA_02G297300	FRIGIDA-like protein	1.59
Cell wall proteins LRR	GLYMA_08G039400	LRRNT_2 domain-containing protein	3.49
Cell wall proteins RGP	GLYMA_08G249900	UDP-arabinopyranose mutase (EC 5.4.99.30)	1.75
Cellulose synthesis	GLYMA_04G048100	Glyco_trans_2-like domain-containing protein	2.24
Cellulose synthesis	GLYMA_20G188600	Glyco_trans_2-like domain-containing protein	1.53
Cellulose synthesis	GLYMA_10G201700	Glyco_trans_2-like domain-containing protein	0.75
Cellulose synthesis	GLYMA_19G190600	highly similar to ( 929)AT5G03760 ATCSLA09 (resistant to agrobacterium transformation 4)	1.00
Cellulose synthesis cellulose synthase	GLYMA_01G014000	nearly identical (1656)AT3G03050 CSLD3 (CELLULOSE SYNTHASE-LIKE 3)	3.80
Cellulose synthesis cellulose synthase	GLYMA_03G217500	nearly identical (1688)AT1G02730 ATCSLD5 (cellulose synthase-like D5)	1.66
Cellulose synthesis cellulose synthase	GLYMA_08G330700	highly similar to ( 817)AT1G55850 ATCSLE1 (Cellulose synthase-like E1)	1.19
Cellulose synthesis cellulose synthase	GLYMA_09G051100	Cellulose synthase (EC 2.4.1.12)	3.44
Cellulose synthesis cellulose synthase	GLYMA_11G010400	nearly identical (2074)AT3G03050 CSLD3 (cellulose synthase-like 3)	3.08
Cellulose synthesis cellulose synthase	GLYMA_02G080900	Cellulose synthase (EC 2.4.1.12)	0.95
Degradation mannan-xylose-arabinose-fucose	GLYMA_09G273500	Mannan endo-1,4-beta-mannosidase (EC 3.2.1.78)	1.56
Degradation mannan-xylose-arabinose-fucose	GLYMA_06G105300	Fn3_like domain-containing protein	0.67
Degradation pectate lyases and polygalacturonases	GLYMA_06G174700	Pectate lyase (EC 4.2.2.2)	1.31
Degradation pectate lyases and polygalacturonases	GLYMA_07G245100	moderately similar to ( 306)AT4G18180 glycoside hydrolase family 28 protein / polygalacturonase (pectinase) family protein	1.65
Degradation pectate lyases and polygalacturonases	GLYMA_09G006000	Pectate lyase (EC 4.2.2.2)	6.07
Degradation pectate lyases and polygalacturonases	GLYMA_15G127500	moderately similar to ( 452)AT2G43870 polygalacturonase, putative / pectinase, putative	4.83
Degradation pectate lyases and polygalacturonases	GLYMA_19G221600	Pectate_lyase_3 domain-containing protein	1.38
Degradation pectate lyases and polygalacturonases	GLYMA_20G112600	Pectate lyase (EC 4.2.2.2)	1.84
Degradation pectate lyases and polygalacturonases	GLYMA_01G042700	Pectate lyase (EC 4.2.2.2)	0.99
Hemicellulose synthesis	GLYMA_10G217800	highly similar to ( 573)AT1G71990 FUT13 (fucosyltransferase 13)	1.14
Cell wall modification	GLYMA_05G065700	moderately similar to ( 216)AT4G17030 ATEXLB1 (Arabidopsis thaliana expansin-like b1)	2.28
Cell wall modification	GLYMA_06G294500	Expansin B protein	1.14
Cell wall modification	GLYMA_09G236200	Expansin	7.16
Cell wall modification	GLYMA_12G062700	Expansin	2.12
Cell wall modification	GLYMA_12G062700	Xyloglucan endotransglucosylase/hydrolase (EC 2.4.1.207)	4.39
Cell wall modification	GLYMA_17G147200	moderately similar to ( 243)AT4G17030 ATEXLB1 (Arabidopsis thaliana expansin-like B1)	3.47
Pectin*esterases acetyl esterase	GLYMA_16G107600	Pectin acetylesterase (EC 3.1.1.-)	2.60
Pectin*esterases PME	GLYMA_03G215900	Pectinesterase (EC 3.1.1.11)	0.72
Pectin*esterases PME	GLYMA_03G216000	Pectinesterase (EC 3.1.1.11)	0.85
Pectin*esterases PME	GLYMA_10G150700	Pectinesterase (EC 3.1.1.11)	0.63
Precursor synthesis	GLYMA_16G014800	O-fucosyltransferase family protein	2.78
Precursor synthesis RHM	GLYMA_08G148100	nearly identical (1225)AT1G78570 RHM1/ROL1 (rhamnose biosynthesis1)	4.71
Precursor synthesis.UGD	glyma13g06050.1	UDP-glucose 6-dehydrogenase	1.09
Cell wall proteins.RGP	glyma08g27590.1	UDP-arabinopyranose mutase	2.46
Cell wall proteins.RGP	glyma13g06690.1	UDP-arabinopyranose mutase	2.23
Cell wall proteins.RGP	glyma04g32080.1	UDP-arabinopyranose mutase	1.17
Cell wall proteins.RGP	glyma01g07930.1	UDP-arabinopyranose mutase	1.11
Cell wall proteins.RGP	glyma19g04240.1	UDP-arabinopyranose mutase	2.99
Cell wall modification	glyma05g29690.1	Xyloglucan endotransglucosylase/hydrolase	3.87
Cell wall modification	glyma17g15690.1	moderately similar to ( 223)AT4G17030| ATEXLB1 (Arabidopsis thaliana expansin-like B1)	4.00
Pectin*esterases.PME	glyma12g00700.1	Pectinesterase	2.63

## Sheet: Table S2
GeneID	logFC	PValue
GlmaCp001	1.28808	0.0435439
GLYMA_01G001900	4.94711	0.0259577
GLYMA_01G004700	0.711015	0.0412112
GLYMA_01G025200	1.0198	0.0429843
GLYMA_01G034000	-2.03292	0.0455427
GLYMA_01G037700	0.764395	0.0171975
GLYMA_01G128500	2.19969	0.0132246
GLYMA_01G161500	0.992042	0.0102334
GLYMA_01G163500	3.88699	0.00295566
GLYMA_01G174700	-1.12865	0.026198
GLYMA_01G176700	1.90969	0.0300473
GLYMA_01G187600	0.644084	0.0348336
GLYMA_01G187900	-1.24689	0.0440537
GLYMA_01G192200	4.74329	0.005856
GLYMA_01G194800	4.45002	0.0471566
GLYMA_01G204000	-2.66507	0.0107934
GLYMA_01G215600	-4.40122	0.0486099
GLYMA_01G218600	-3.21845	0.0287039
GLYMA_01G222100	0.998893	0.00916361
GLYMA_01G222500	-1.5367	0.0196148
GLYMA_01G226600	2.01117	0.046194
GLYMA_01G230300	-1.50391	0.0165588
GLYMA_01G244300	0.731362	0.0441742
GLYMA_02G001000	-1.35691	0.0108745
GLYMA_02G007400	1.70589	0.00537612
GLYMA_02G011900	0.995343	0.0189322
GLYMA_02G032800	0.84112	0.0384651
GLYMA_02G041300	-1.30471	0.0172744
GLYMA_02G042200	1.08548	0.00124127
GLYMA_02G044800	0.641016	0.0464247
GLYMA_02G046400	3.3843	0.00472554
GLYMA_02G046800	0.592605	0.0372344
GLYMA_02G053300	0.820052	0.00830573
GLYMA_02G067000	4.99263	0.00287796
GLYMA_02G069100	0.706951	0.0303108
GLYMA_02G072700	0.909098	0.0436479
GLYMA_02G072800	5.43641	0.00911564
GLYMA_02G089500	-4.78343	0.0408241
GLYMA_02G091300	0.724532	0.0177558
GLYMA_02G119300	1.99932	0.0146159
GLYMA_02G120400	-1.54139	0.0115835
GLYMA_02G153500	0.667164	0.0432202
GLYMA_02G226800	1.06272	0.00831449
GLYMA_02G230700	-5.58181	0.00921475
GLYMA_02G260100	-2.54317	0.00751035
GLYMA_02G263400	-2.01386	0.0155104
GLYMA_02G264000	2.78287	0.0101058
GLYMA_02G264500	-1.554	0.024561
GLYMA_02G267700	2.09906	0.0344976
GLYMA_02G276700	-1.12794	0.00484706
GLYMA_02G294500	-1.87993	0.0176
GLYMA_03G007200	0.991965	0.00411049
GLYMA_03G007600	1.56514	0.0263585
GLYMA_03G028500	2.22463	0.0444663
GLYMA_03G037400	2.43052	0.00179362
GLYMA_03G043100	-3.7639	0.0383256
GLYMA_03G043600	0.59722	0.0487068
GLYMA_03G046400	2.68304	0.0160394
GLYMA_03G076500	2.17862	0.000230654
GLYMA_03G117300	-1.52117	0.0295537
GLYMA_03G145900	0.70153	0.020649
GLYMA_03G151500	5.63252	0.00562098
GLYMA_03G173900	3.57348	0.015756
GLYMA_03G177200	-1.36311	0.0369461
GLYMA_03G181200	-1.0442	0.00673241
GLYMA_03G197500	1.25045	0.0355495
GLYMA_03G205000	-1.55823	0.00132299
GLYMA_03G221600	1.38612	0.0490606
GLYMA_03G229700	2.16859	0.0106879
GLYMA_03G230400	0.902965	0.0273217
GLYMA_03G233300	-2.05911	0.047773
GLYMA_03G235000	0.785704	0.0438596
GLYMA_03G254500	7.12637	0.000711965
GLYMA_03G255000	1.29286	0.0204136
GLYMA_03G257300	1.63403	0.0388398
GLYMA_03G261600	-1.38846	0.0187374
GLYMA_03G263100	3.34525	0.0220119
GLYMA_04G016700	0.968433	0.0336215
GLYMA_04G022700	4.36267	0.0178342
GLYMA_04G024300	-1.49368	0.0130599
GLYMA_04G032000	-1.366	0.0442066
GLYMA_04G041400	4.63416	0.0434763
GLYMA_04G049700	4.25922	0.0407355
GLYMA_04G055800	2.09595	0.0298622
GLYMA_04G063500	0.823036	0.0347287
GLYMA_04G068000	-3.74003	0.014885
GLYMA_04G076900	0.738068	0.0364141
GLYMA_04G079200	6.45431	0.0361041
GLYMA_04G081700	0.815801	0.0178324
GLYMA_04G090400	-4.18862	0.00957765
GLYMA_04G119300	-1.03745	0.026198
GLYMA_04G121000	-1.97028	2.65499e-05
GLYMA_04G178700	0.730183	0.0315834
GLYMA_04G192900	0.780216	0.0212982
GLYMA_04G204100	1.90892	0.0251396
GLYMA_04G222500	-1.70953	0.0150379
GLYMA_04G225900	0.760564	0.0456288
GLYMA_04G232900	-1.39398	0.0132318
GLYMA_04G233000	-1.81226	0.032506
GLYMA_05G002600	-1.5386	0.000112601
GLYMA_05G002700	-1.85282	0.0178063
GLYMA_05G004600	1.91156	0.044389
GLYMA_05G009400	-1.01536	0.0325772
GLYMA_05G010600	-1.35865	0.0427647
GLYMA_05G029100	-1.32245	0.0405018
GLYMA_05G040300	-2.59034	0.0110717
GLYMA_05G045500	0.771255	0.0256814
GLYMA_05G057800	-1.12157	0.03785
GLYMA_05G098800	-1.30458	0.00736139
GLYMA_05G104300	-2.36027	0.0162622
GLYMA_05G124400	-3.59032	0.0198625
GLYMA_05G143200	-1.2541	0.0310449
GLYMA_05G145600	-1.779	0.0319655
GLYMA_05G161400	-1.19156	0.0368188
GLYMA_05G176300	-2.06845	0.0287375
GLYMA_05G182600	0.966226	0.0207542
GLYMA_05G190300	2.37249	0.0102607
GLYMA_05G191000	3.97959	0.0263509
GLYMA_05G192900	0.960125	0.0262095
GLYMA_05G194100	0.959054	0.047326
GLYMA_05G208000	-1.11515	0.0408088
GLYMA_05G224300	2.73473	0.0256112
GLYMA_05G227100	-5.35799	0.0109862
GLYMA_05G238500	0.758761	0.0426586
GLYMA_05G242000	0.723301	0.0327425
GLYMA_05G243700	1.37367	0.0297945
GLYMA_05G248400	-2.30318	0.0320574
GLYMA_06G003100	-1.34981	0.0244227
GLYMA_06G025100	1.27957	0.0210108
GLYMA_06G034200	0.935302	0.0461797
GLYMA_06G040000	-1.68988	0.0296925
GLYMA_06G045600	-1.03842	0.0134163
GLYMA_06G061300	0.996681	0.0210161
GLYMA_06G062600	0.64358	0.0347548
GLYMA_06G063100	-1.19322	0.0183296
GLYMA_06G063200	0.657354	0.0274965
GLYMA_06G069600	-3.08682	0.0213925
GLYMA_06G076100	0.662052	0.0418361
GLYMA_06G076400	1.71295	0.0429915
GLYMA_06G087000	-1.65599	0.0302357
GLYMA_06G103200	1.94814	0.0339756
GLYMA_06G105700	0.634637	0.0387227
GLYMA_06G108900	-2.5157	0.000154226
GLYMA_06G112900	-2.54344	0.00548693
GLYMA_06G113300	4.58069	0.033304
GLYMA_06G114100	0.622013	0.0361189
GLYMA_06G117400	-1.44594	0.000468664
GLYMA_06G133500	0.725259	0.0175574
GLYMA_06G134200	-2.57778	0.0186175
GLYMA_06G159100	1.41274	0.0405192
GLYMA_06G161700	0.643929	0.0422505
GLYMA_06G169000	-1.45377	0.0178894
GLYMA_06G175300	4.96108	0.0258297
GLYMA_06G190500	2.33009	0.00768874
GLYMA_06G191000	3.17099	0.0452129
GLYMA_06G198000	4.64315	0.0499248
GLYMA_06G203800	0.702395	0.0389091
GLYMA_06G216600	-4.71672	0.00616248
GLYMA_06G262300	0.707189	0.0393164
GLYMA_06G278400	-4.56001	0.0290482
GLYMA_06G290300	3.46518	0.0019565
GLYMA_06G296100	-2.44138	0.0419952
GLYMA_06G296500	0.678389	0.0393573
GLYMA_06G304900	0.937319	0.0388986
GLYMA_06G309100	-1.6266	0.0190292
GLYMA_07G008800	0.690055	0.0314095
GLYMA_07G013700	2.40486	0.00281429
GLYMA_07G014800	-1.58435	0.0404985
GLYMA_07G017800	1.25362	0.0136275
GLYMA_07G018700	0.873239	0.0199829
GLYMA_07G026400	-1.20196	0.00570372
GLYMA_07G046400	0.653439	0.0284697
GLYMA_07G046900	-1.47311	0.00831004
GLYMA_07G055500	-1.77304	0.00600591
GLYMA_07G055600	-1.71631	0.0247377
GLYMA_07G069700	-4.22629	0.030807
GLYMA_07G083900	0.872215	0.00471979
GLYMA_07G084000	0.833776	0.0117314
GLYMA_07G085000	4.96071	0.0175144
GLYMA_07G090800	-1.29897	0.00941958
GLYMA_07G127400	1.14716	0.0372112
GLYMA_07G130400	0.821488	0.00979043
GLYMA_07G143400	-2.88088	0.0490576
GLYMA_07G179400	-4.09981	0.00215304
GLYMA_07G221200	-2.33453	0.0241366
GLYMA_07G228300	-2.57191	0.0475523
GLYMA_07G231800	-3.46022	0.0195683
GLYMA_07G243900	5.27987	0.0163912
GLYMA_07G247500	-1.17321	0.0160844
GLYMA_07G256900	0.841608	0.0230682
GLYMA_07G264700	-3.98997	0.00764824
GLYMA_07G272400	-1.34152	0.0128678
GLYMA_07G272500	-1.23073	0.0371885
GLYMA_08G000500	2.46565	0.0190372
GLYMA_08G011700	2.81443	0.00713715
GLYMA_08G019600	0.708813	0.0484848
GLYMA_08G021800	1.28967	0.0371087
GLYMA_08G044700	0.707803	0.0407079
GLYMA_08G070200	1.11071	0.0203605
GLYMA_08G091700	-3.32477	0.045693
GLYMA_08G097600	3.89772	0.0102905
GLYMA_08G099200	0.998542	0.0464406
GLYMA_08G104200	0.759353	0.0170903
GLYMA_08G105500	-2.00318	0.0220898
GLYMA_08G105700	1.34213	0.0326708
GLYMA_08G113600	0.798789	0.00921856
GLYMA_08G122000	0.915116	0.0207095
GLYMA_08G122200	-1.78423	0.0337485
GLYMA_08G141400	1.80358	0.00702726
GLYMA_08G148100	1.75787	0.0066891
GLYMA_08G152400	-1.38384	0.0454664
GLYMA_08G171000	-2.41746	0.0239437
GLYMA_08G180900	-3.88886	0.000601864
GLYMA_08G188200	-1.06032	0.0328466
GLYMA_08G189900	2.39318	0.000927498
GLYMA_08G190500	-1.10061	0.00202488
GLYMA_08G191500	1.92744	0.0442926
GLYMA_08G199900	1.54444	0.000203891
GLYMA_08G207600	1.53864	0.0215625
GLYMA_08G209800	2.81609	0.00427697
GLYMA_08G219200	0.958404	0.0246271
GLYMA_08G228300	0.647245	0.049762
GLYMA_08G237400	-1.30112	0.0291633
GLYMA_08G241200	-1.496	0.0255662
GLYMA_08G246200	-2.7178	0.0186732
GLYMA_08G251200	3.43666	0.000422753
GLYMA_08G253200	-3.38815	0.0391023
GLYMA_08G258900	-1.91897	0.0210465
GLYMA_08G259100	-1.62124	0.0199754
GLYMA_08G289800	4.61786	0.0350565
GLYMA_08G310900	-2.98301	0.0242061
GLYMA_08G313200	-2.83564	0.014495
GLYMA_08G314800	-3.07381	0.0367941
GLYMA_08G321500	3.43129	0.00783266
GLYMA_08G321700	-1.47563	0.022178
GLYMA_08G328200	-2.26702	0.0488547
GLYMA_08G332300	-2.94599	0.0367452
GLYMA_08G339000	-1.80297	0.0325141
GLYMA_08G341800	4.60263	0.0320422
GLYMA_08G351400	1.26657	0.024623
GLYMA_08G359000	1.56046	0.00420002
GLYMA_09G007500	-1.78197	0.0437617
GLYMA_09G018800	1.66581	0.0331981
GLYMA_09G020700	2.19781	0.0474732
GLYMA_09G052600	-3.99725	0.016631
GLYMA_09G093600	0.953077	0.0352243
GLYMA_09G098800	2.47119	0.0414064
GLYMA_09G150000	-2.65713	0.00589613
GLYMA_09G161200	-4.76577	0.0196196
GLYMA_09G184900	3.54732	0.015475
GLYMA_09G190800	0.883099	0.033427
GLYMA_09G199300	-2.0877	0.0452418
GLYMA_09G201300	0.67844	0.0433665
GLYMA_09G205500	-1.0877	0.047045
GLYMA_09G209900	3.51411	0.0417088
GLYMA_09G215100	1.26532	0.00746462
GLYMA_09G228100	0.655509	0.0353933
GLYMA_09G230300	-1.3678	0.0320744
GLYMA_09G236200	3.16682	0.00264298
GLYMA_09G240100	3.11037	0.0351677
GLYMA_09G240600	-1.43234	0.0211123
GLYMA_09G243500	1.30511	0.0381068
GLYMA_09G256700	0.942365	0.0152082
GLYMA_09G263300	-1.07834	0.021089
GLYMA_09G265100	-2.55312	0.0215296
GLYMA_09G272100	-1.50234	0.0103461
GLYMA_09G277000	0.70639	0.0294917
GLYMA_09G279100	-1.43748	0.0216563
GLYMA_09G284700	-1.88775	0.0108506
GLYMA_10G001800	5.58842	0.0141674
GLYMA_10G005400	2.25745	0.0143215
GLYMA_10G007000	-1.93914	0.00741648
GLYMA_10G016300	-1.55445	0.0178489
GLYMA_10G020000	3.01927	0.0266011
GLYMA_10G035900	2.76049	0.0253916
GLYMA_10G037400	0.871909	0.0160948
GLYMA_10G047700	1.66791	0.0454244
GLYMA_10G063800	4.34706	0.0425121
GLYMA_10G071000	1.88178	0.0397363
GLYMA_10G127100	0.75441	0.038766
GLYMA_10G142600	0.755439	0.0286115
GLYMA_10G149500	-1.03	0.00461061
GLYMA_10G150000	-1.09633	0.0353457
GLYMA_10G150600	-3.68674	0.0286545
GLYMA_10G165000	-2.88262	0.0467385
GLYMA_10G168600	0.775833	0.013849
GLYMA_10G173300	-1.23713	0.0163488
GLYMA_10G178600	0.803547	0.030998
GLYMA_10G183300	0.643041	0.0447194
GLYMA_10G185700	3.42253	0.000496185
GLYMA_10G190700	-1.63039	0.0414996
GLYMA_10G216700	0.766364	0.0262236
GLYMA_10G230500	1.50002	0.0215744
GLYMA_10G252100	-1.29169	0.0142095
GLYMA_10G260200	1.58576	0.00865663
GLYMA_10G261400	0.643648	0.0402589
GLYMA_10G262200	0.831801	0.0398199
GLYMA_10G268400	5.04662	0.0206363
GLYMA_10G275100	1.87831	0.00514146
GLYMA_10G285000	-1.4275	0.0312303
GLYMA_10G296000	0.804845	0.0483831
GLYMA_11G001800	-1.669	0.0199039
GLYMA_11G008400	-2.21453	0.0113918
GLYMA_11G011400	0.670133	0.044617
GLYMA_11G013100	-1.88158	0.0140846
GLYMA_11G015100	3.76045	0.048906
GLYMA_11G023600	-1.2277	0.0122928
GLYMA_11G026100	1.189	0.0250039
GLYMA_11G034000	-1.33287	0.0144071
GLYMA_11G034500	-2.78704	0.0353601
GLYMA_11G036200	-1.03007	0.046769
GLYMA_11G039300	-1.8931	0.0145997
GLYMA_11G042300	0.639796	0.0418989
GLYMA_11G074500	-1.72582	0.0396289
GLYMA_11G101700	0.624323	0.0485691
GLYMA_11G110600	-1.62297	0.0328199
GLYMA_11G119600	-1.46918	0.00669276
GLYMA_11G135500	0.625565	0.0486416
GLYMA_11G139700	-1.27558	0.0169418
GLYMA_11G238500	-1.8449	0.0385218
GLYMA_12G011300	-4.71298	0.0479584
GLYMA_12G011600	-1.38029	0.0243187
GLYMA_12G013500	0.909684	0.00360431
GLYMA_12G027400	0.865589	0.0167026
GLYMA_12G041800	-1.39268	0.0187338
GLYMA_12G047700	4.19103	0.0390434
GLYMA_12G060500	0.966731	0.0414999
GLYMA_12G061900	-1.53177	0.0492808
GLYMA_12G063400	-1.06805	0.0298958
GLYMA_12G076200	-1.87953	0.0474363
GLYMA_12G085900	0.910146	0.0142755
GLYMA_12G086300	-1.44308	0.0186545
GLYMA_12G103400	4.09582	0.0196397
GLYMA_12G168300	-1.30053	0.0395582
GLYMA_12G185000	-1.28931	0.0456377
GLYMA_12G194000	0.936581	0.0183875
GLYMA_12G194100	0.727546	0.0383272
GLYMA_12G199800	0.715029	0.0449013
GLYMA_12G207900	-1.84736	0.0417617
GLYMA_12G215100	1.23967	0.0241797
GLYMA_12G229000	1.07207	0.0170507
GLYMA_13G013400	2.1986	0.0432932
GLYMA_13G026400	-4.35321	0.0479717
GLYMA_13G074700	-1.39558	0.00196988
GLYMA_13G077200	2.6494	0.0456021
GLYMA_13G101600	-1.66883	0.0200473
GLYMA_13G131300	-1.26499	0.040394
GLYMA_13G133500	-1.65042	0.0422674
GLYMA_13G147600	2.62186	0.00666123
GLYMA_13G148100	2.2253	0.0483417
GLYMA_13G153000	0.731451	0.0390965
GLYMA_13G176800	-2.68095	0.0368947
GLYMA_13G195500	2.12434	0.0307944
GLYMA_13G202500	3.22282	0.0374528
GLYMA_13G208800	0.727118	0.0411889
GLYMA_13G219900	1.10854	0.0412103
GLYMA_13G226900	-3.37762	0.0417758
GLYMA_13G243900	-2.03508	0.0474924
GLYMA_13G255100	2.62161	0.0204008
GLYMA_13G275900	1.21499	0.0476146
GLYMA_13G280700	-2.32167	0.0318057
GLYMA_13G282800	-1.30838	0.0269153
GLYMA_13G286800	4.48957	0.0440933
GLYMA_13G290900	2.42141	0.039884
GLYMA_13G297000	1.26343	0.00453261
GLYMA_13G297100	1.32109	0.0109477
GLYMA_13G297200	-1.91298	0.0491804
GLYMA_13G323800	-1.19816	0.03123
GLYMA_13G330600	0.883975	0.0166355
GLYMA_13G331400	0.660684	0.0293758
GLYMA_13G356500	-1.64733	0.00131081
GLYMA_13G362500	0.805561	0.0315222
GLYMA_13G363900	0.646929	0.043947
GLYMA_14G007500	0.721476	0.0438794
GLYMA_14G010500	0.895394	0.0141704
GLYMA_14G012400	-3.5914	0.000784284
GLYMA_14G019100	-1.12027	0.04627
GLYMA_14G041100	0.858572	0.0210013
GLYMA_14G051600	-3.80155	0.00876337
GLYMA_14G055600	-1.14437	0.0430458
GLYMA_14G064500	0.612119	0.0371874
GLYMA_14G067200	-1.61001	0.0384314
GLYMA_14G090500	-1.73488	0.0085129
GLYMA_14G121500	-1.37916	0.029668
GLYMA_14G148700	0.67864	0.0310508
GLYMA_14G179400	1.7945	0.0341507
GLYMA_14G181000	0.724151	0.023509
GLYMA_14G187100	-1.40142	0.0316883
GLYMA_14G195300	0.8225	0.0354133
GLYMA_14G197500	0.806618	0.043755
GLYMA_14G213800	1.42614	0.000789682
GLYMA_14G215300	1.42544	0.0209263
GLYMA_14G221200	-1.41272	0.0280796
GLYMA_15G002200	-1.94024	0.0377282
GLYMA_15G003000	-1.08434	0.0288961
GLYMA_15G003900	0.69497	0.0421163
GLYMA_15G004200	1.39323	0.0469558
GLYMA_15G012000	-2.07451	0.0263974
GLYMA_15G041500	4.73705	0.0443977
GLYMA_15G042000	0.907344	0.0409775
GLYMA_15G045800	0.859842	0.0172696
GLYMA_15G046800	-1.83433	0.0435125
GLYMA_15G050000	3.06556	0.0159946
GLYMA_15G072100	3.62248	0.00609782
GLYMA_15G072300	-1.01341	0.0158291
GLYMA_15G077900	-1.36168	0.0440341
GLYMA_15G079000	-1.073	0.0104661
GLYMA_15G080500	1.89015	0.0442231
GLYMA_15G089000	1.91718	0.0498551
GLYMA_15G092400	-1.08871	0.0112116
GLYMA_15G094000	-1.53977	0.0402008
GLYMA_15G098000	0.661385	0.0385855
GLYMA_15G099400	1.03793	0.00103373
GLYMA_15G106600	1.11642	0.0185198
GLYMA_15G107000	1.3287	0.0203053
GLYMA_15G109500	-3.31934	0.0104372
GLYMA_15G110700	1.52227	0.0367427
GLYMA_15G113800	0.727972	0.0418028
GLYMA_15G116400	2.08901	0.0430618
GLYMA_15G118200	-1.58704	0.0203044
GLYMA_15G120500	-3.17172	0.00592672
GLYMA_15G123000	1.11596	0.0229254
GLYMA_15G133100	-2.32618	0.0203906
GLYMA_15G133200	1.98351	0.0130432
GLYMA_15G138200	2.06276	0.0280764
GLYMA_15G141500	-4.7949	0.0426356
GLYMA_15G171300	4.20869	0.0498653
GLYMA_15G173200	0.647389	0.0404875
GLYMA_15G226200	0.825626	0.026684
GLYMA_15G267200	-1.11542	0.000616763
GLYMA_15G275000	-1.15303	0.0420618
GLYMA_16G006900	-1.87539	0.015728
GLYMA_16G008100	-2.1947	0.00598184
GLYMA_16G013400	-2.2476	0.00337105
GLYMA_16G014200	0.755925	0.0245334
GLYMA_16G023500	0.836393	0.0172819
GLYMA_16G026300	-3.10035	0.0104723
GLYMA_16G027700	1.63779	0.0438054
GLYMA_16G033900	1.51087	0.0243734
GLYMA_16G040600	2.25009	0.0185761
GLYMA_16G059700	-1.04702	0.00730407
GLYMA_16G063200	3.13742	0.0046313
GLYMA_16G125100	1.55288	0.00969144
GLYMA_16G150700	2.20675	0.039727
GLYMA_16G151800	-1.67068	0.0227002
GLYMA_16G158700	0.90323	0.0275621
GLYMA_16G161500	0.956018	0.00391707
GLYMA_16G197500	-2.03562	0.0140003
GLYMA_16G199700	3.16284	0.00838607
GLYMA_16G203900	0.657251	0.0297553
GLYMA_17G007700	-1.18167	0.00786384
GLYMA_17G022200	-1.8385	0.00771168
GLYMA_17G026600	0.765581	0.0387033
GLYMA_17G027500	-1.33751	0.028547
GLYMA_17G034000	1.15457	0.0354247
GLYMA_17G038600	2.74736	0.00550569
GLYMA_17G041500	-1.09647	0.00319652
GLYMA_17G048700	-2.04745	0.0469713
GLYMA_17G056900	-1.53859	0.0403029
GLYMA_17G069100	2.3484	0.00351185
GLYMA_17G074200	0.744443	0.0191321
GLYMA_17G074400	1.40057	0.0149476
GLYMA_17G084700	0.751344	0.0293829
GLYMA_17G087400	0.972703	0.0312871
GLYMA_17G088300	-2.68714	0.0323154
GLYMA_17G088800	-2.74678	0.00199606
GLYMA_17G093900	-1.54143	9.64956e-05
GLYMA_17G121400	0.671892	0.0278022
GLYMA_17G121600	0.804742	0.0191121
GLYMA_17G135200	-1.14156	0.0152274
GLYMA_17G146700	1.89061	0.0390771
GLYMA_17G146900	1.88707	0.0223317
GLYMA_17G147700	0.860594	0.0221486
GLYMA_17G148000	-1.76059	0.045013
GLYMA_17G204700	1.56291	0.00293315
GLYMA_17G233600	-1.1742	0.0193945
GLYMA_17G236400	0.756355	0.0489846
GLYMA_17G242500	0.973024	0.0073191
GLYMA_17G250800	-2.33428	0.0426992
GLYMA_17G250900	4.16414	0.0154791
GLYMA_17G251600	1.99738	0.0433989
GLYMA_17G261600	0.98342	0.0134402
GLYMA_18G001100	0.885899	0.0378662
GLYMA_18G003100	0.647392	0.0470068
GLYMA_18G006800	2.3904	0.0042058
GLYMA_18G030500	2.27374	0.00767884
GLYMA_18G030600	2.53935	0.0100364
GLYMA_18G072700	2.91396	0.0319393
GLYMA_18G075400	-1.70324	0.0186034
GLYMA_18G101400	-1.93276	0.0356094
GLYMA_18G102800	-2.15876	0.0397818
GLYMA_18G208300	-1.20921	0.0480155
GLYMA_18G234200	-2.67237	0.0092311
GLYMA_18G239000	2.11959	0.026757
GLYMA_18G241400	1.46581	0.0228411
GLYMA_18G242200	-2.59598	0.0305394
GLYMA_18G270300	0.924227	0.0394469
GLYMA_18G271200	5.63582	0.00663608
GLYMA_18G281300	-4.71109	0.0433745
GLYMA_18G281800	4.94033	0.0115348
GLYMA_18G288400	-1.09099	0.00667606
GLYMA_18G294300	1.455	0.00955899
GLYMA_18G297400	1.36411	0.0452584
GLYMA_19G000400	0.66512	0.0398061
GLYMA_19G003000	-2.98699	0.0359145
GLYMA_19G004200	0.919203	0.00837666
GLYMA_19G007900	0.781793	0.0222104
GLYMA_19G010300	0.751025	0.027069
GLYMA_19G010600	1.14456	0.029527
GLYMA_19G016500	-2.2415	0.0387001
GLYMA_19G087600	4.34736	0.0394957
GLYMA_19G111300	-1.00712	0.0280214
GLYMA_19G116300	0.744434	0.029954
GLYMA_19G122000	2.7867	0.00462514
GLYMA_19G126000	0.755224	0.0160558
GLYMA_19G130000	-1.0433	0.0152717
GLYMA_19G130700	4.05105	0.0209743
GLYMA_19G137400	-1.15126	0.0293068
GLYMA_19G168200	-1.43055	0.0268661
GLYMA_19G170100	-1.04975	0.0452752
GLYMA_19G171100	0.989095	0.0491104
GLYMA_19G180900	1.64018	0.0202717
GLYMA_19G188800	2.06872	0.0298297
GLYMA_19G207300	0.840075	0.0377583
GLYMA_19G209000	3.73629	0.0306236
GLYMA_19G217300	-1.91467	0.0227738
GLYMA_19G224400	0.981637	0.00663887
GLYMA_19G238300	0.951481	0.0115898
GLYMA_19G238700	0.920515	0.0498896
GLYMA_19G252100	1.7039	0.0234988
GLYMA_20G010000	-5.85361	0.00450717
GLYMA_20G011100	-1.43409	0.0038578
GLYMA_20G021700	0.945913	0.0448941
GLYMA_20G044000	1.37637	0.0261696
GLYMA_20G100500	4.97045	0.0141088
GLYMA_20G119300	2.99804	0.0297611
GLYMA_20G142700	1.56768	0.0371889
GLYMA_20G145500	1.28492	0.0334779
GLYMA_20G150400	0.934973	0.0433791
GLYMA_20G151100	5.33365	0.00869271
GLYMA_20G156600	2.4812	0.0241828
GLYMA_20G159100	3.45465	0.0136177
GLYMA_20G178800	1.44085	0.0228097
GLYMA_20G180900	2.20314	0.00755067
GLYMA_20G195900	1.24245	0.000189356
GLYMA_20G199000	-2.4289	0.0291599
GLYMA_20G205000	0.977804	0.00862897
GLYMA_20G209200	0.947865	0.0226708
GLYMA_20G229600	4.44838	0.020019
GLYMA_20G236700	1.25607	0.0210738
GLYMA_20G238600	-1.926	0.00239162
GLYMA_20G240900	1.1484	0.000728697
GLYMA_20G241200	0.9794	0.0316853

## Sheet: Table S3
GeneID	logFC	PValue
GlmaCp010	0.675928	0.0269845
GlmaCp020	-1.0999	0.00384984
GlmaCp021	0.76613	0.0331138
GlmaCp023	0.952145	0.00745443
GlmaCp046	0.75918	0.0130019
GlmaCp053	-1.15194	0.00638074
GlmaCp060	0.755574	0.0396716
GlmaCp061	-2.42609	0.0143536
GlmaCp069	0.617106	0.0400396
GlmaCp071	-1.69159	0.0431971
GlmaCp075	-1.312	0.045136
GlmaCt005	0.857073	0.0323777
GlmaCt015	-2.31833	0.0480108
GlmaCt016	-2.31442	0.0407618
GlmaCt018	-1.01414	0.0133291
GLYMA_01G000100	-4.36895	0.0206823
GLYMA_01G001600	-1.44852	0.00311123
GLYMA_01G004400	-1.75927	0.0270294
GLYMA_01G004700	0.687066	0.0437792
GLYMA_01G006400	-1.26398	0.00737342
GLYMA_01G006900	-3.21255	0.0322582
GLYMA_01G007900	-2.14757	0.004576
GLYMA_01G008900	0.653078	0.0289963
GLYMA_01G009800	-2.30575	0.0492572
GLYMA_01G013100	-5.08521	0.042718
GLYMA_01G013200	-7.12401	0.000227615
GLYMA_01G014500	0.848849	0.0203799
GLYMA_01G014900	-1.66468	0.0335562
GLYMA_01G016900	-1.22722	0.00805147
GLYMA_01G018300	-1.58707	0.0134798
GLYMA_01G022300	0.77348	0.0341057
GLYMA_01G022900	-2.22189	0.00494354
GLYMA_01G024800	-1.25564	0.0365691
GLYMA_01G025200	1.05743	0.0172447
GLYMA_01G025300	-2.03352	0.0012603
GLYMA_01G025600	0.716804	0.0304466
GLYMA_01G026100	-1.03835	0.00347668
GLYMA_01G026200	0.630872	0.0419175
GLYMA_01G026600	-1.94094	0.011981
GLYMA_01G027800	-2.03466	0.000198601
GLYMA_01G030600	0.659151	0.0239044
GLYMA_01G031200	-1.89807	0.00617095
GLYMA_01G032100	0.640272	0.0324849
GLYMA_01G032200	-2.01801	0.0317665
GLYMA_01G036200	1.13561	0.0475555
GLYMA_01G041200	-1.40836	0.0320687
GLYMA_01G045300	-2.66868	0.000311034
GLYMA_01G052200	-4.86609	0.0139994
GLYMA_01G053100	-1.1999	0.0320154
GLYMA_01G053600	-2.05188	0.0387017
GLYMA_01G067200	-2.51499	0.0323043
GLYMA_01G085100	2.70592	0.0434356
GLYMA_01G102200	-1.20755	0.0238476
GLYMA_01G128000	-2.23033	0.0124711
GLYMA_01G134700	-4.51521	0.0307267
GLYMA_01G141700	-2.04598	0.0209366
GLYMA_01G144500	0.955119	0.00811505
GLYMA_01G150500	-1.77554	0.0021929
GLYMA_01G153900	0.67239	0.039879
GLYMA_01G157200	-3.34841	0.00104224
GLYMA_01G168100	0.682576	0.0231576
GLYMA_01G176000	0.903181	0.012339
GLYMA_01G179100	-1.20091	0.00390187
GLYMA_01G180000	-2.66687	0.0185517
GLYMA_01G182500	-4.04887	0.0389116
GLYMA_01G183100	-1.96662	0.0315108
GLYMA_01G183800	-2.25967	0.0199734
GLYMA_01G184400	0.762097	0.0176174
GLYMA_01G186200	2.15974	0.0297598
GLYMA_01G188700	0.931257	0.0248148
GLYMA_01G190100	-2.96421	0.0253812
GLYMA_01G192200	2.36076	0.0170138
GLYMA_01G194300	-1.49618	0.034396
GLYMA_01G197500	-4.68082	0.034035
GLYMA_01G200700	0.845574	0.017505
GLYMA_01G206000	4.35204	0.0489245
GLYMA_01G209200	-4.24174	0.00279003
GLYMA_01G211000	-1.24588	0.0301249
GLYMA_01G212500	-1.97702	0.0266926
GLYMA_01G217500	1.3973	4.33108e-05
GLYMA_01G221600	-1.56722	0.00626479
GLYMA_01G222700	-1.82507	0.00414822
GLYMA_01G223200	1.37527	0.0152135
GLYMA_01G223800	-1.64491	0.0454644
GLYMA_01G225800	-1.60182	0.000747528
GLYMA_01G229000	-5.21137	0.0287133
GLYMA_01G234300	-1.90968	0.0314849
GLYMA_01G235300	2.98867	0.000462855
GLYMA_01G236700	-1.87461	0.0142543
GLYMA_01G238400	-3.13011	0.00042246
GLYMA_01G239700	-1.43211	0.0377902
GLYMA_02G000600	-2.58388	0.0459957
GLYMA_02G002000	0.917819	0.0493827
GLYMA_02G002100	-1.45347	0.0350007
GLYMA_02G002200	-3.01017	9.70734e-05
GLYMA_02G002300	-1.68079	0.00342495
GLYMA_02G002800	-1.96912	0.0341376
GLYMA_02G003500	-1.74761	0.0345441
GLYMA_02G003600	-3.77484	0.00228564
GLYMA_02G003800	-2.99431	0.000171907
GLYMA_02G004100	-2.43459	0.0055314
GLYMA_02G005200	-1.24243	0.0330426
GLYMA_02G006900	-3.25087	0.00520865
GLYMA_02G008100	-1.49651	0.0223507
GLYMA_02G009500	0.782372	0.0166402
GLYMA_02G010100	-3.19415	0.0166731
GLYMA_02G010900	0.896954	0.014507
GLYMA_02G011300	-1.79981	0.0236609
GLYMA_02G013500	0.994739	0.0378465
GLYMA_02G014300	0.948265	0.0493138
GLYMA_02G015800	-1.11062	0.00226807
GLYMA_02G017400	-1.34553	0.000819245
GLYMA_02G019800	-3.27511	0.0172631
GLYMA_02G020800	-1.05766	0.0420724
GLYMA_02G025900	0.775446	0.0324875
GLYMA_02G029600	-1.21182	0.030357
GLYMA_02G034300	-1.89013	0.0271883
GLYMA_02G035700	-1.87922	0.026054
GLYMA_02G035800	-1.96742	0.00500279
GLYMA_02G036500	0.974555	0.0211209
GLYMA_02G037400	0.708865	0.0259754
GLYMA_02G038600	-1.53226	0.00191806
GLYMA_02G040400	-1.5195	0.00526173
GLYMA_02G040500	-1.99811	0.00879304
GLYMA_02G041400	-1.21341	0.0188516
GLYMA_02G042200	0.956559	0.00297017
GLYMA_02G044900	-1.08308	0.0255497
GLYMA_02G047600	-2.79285	0.0285457
GLYMA_02G048900	-4.52016	0.0140145
GLYMA_02G050200	1.49349	0.0170895
GLYMA_02G050400	0.782666	0.010144
GLYMA_02G050700	-3.58632	0.000221523
GLYMA_02G051800	-2.07696	0.00606098
GLYMA_02G052000	-1.93273	0.0246184
GLYMA_02G053300	0.651769	0.0293631
GLYMA_02G057100	-1.0519	0.0258022
GLYMA_02G057800	-1.97978	0.0189822
GLYMA_02G057900	-2.00844	0.00460418
GLYMA_02G062500	-1.38198	0.0403914
GLYMA_02G065700	-1.20783	0.0121882
GLYMA_02G066800	-1.58392	0.00114863
GLYMA_02G069800	-1.37054	0.0390813
GLYMA_02G075100	-1.77166	0.0183365
GLYMA_02G076300	-1.00886	0.00131159
GLYMA_02G077400	0.670347	0.028309
GLYMA_02G079000	-4.39209	0.0164219
GLYMA_02G080500	0.719446	0.0165946
GLYMA_02G085400	-1.05513	0.0453578
GLYMA_02G086500	-2.90183	0.0445776
GLYMA_02G088600	0.980037	0.0292193
GLYMA_02G094600	-1.91751	0.00112136
GLYMA_02G096800	-1.0842	0.00568399
GLYMA_02G106900	-1.65283	0.00956898
GLYMA_02G107500	-2.89427	0.0369326
GLYMA_02G109800	0.836623	0.00951883
GLYMA_02G111500	-1.92952	0.0153268
GLYMA_02G113400	-1.16269	0.0259279
GLYMA_02G113500	-1.3158	0.00953356
GLYMA_02G117000	0.914245	0.0460317
GLYMA_02G117100	-4.44322	0.0278949
GLYMA_02G117200	-4.87516	0.0228196
GLYMA_02G117900	-2.36644	0.0493264
GLYMA_02G120400	-3.6286	0.000264192
GLYMA_02G123100	-3.49641	0.00998227
GLYMA_02G124100	2.10205	0.0338313
GLYMA_02G125700	-1.18546	0.0414526
GLYMA_02G127400	0.775714	0.0164517
GLYMA_02G137300	-1.07093	0.0114488
GLYMA_02G143300	0.632849	0.0351977
GLYMA_02G143400	-1.09707	0.0142955
GLYMA_02G146800	0.717334	0.0330775
GLYMA_02G147200	-3.62206	0.0121806
GLYMA_02G147800	0.71819	0.0205778
GLYMA_02G149600	-2.68328	0.0282641
GLYMA_02G151800	-2.44044	0.0441434
GLYMA_02G154700	-1.86858	0.00441217
GLYMA_02G217600	-5.18034	0.0035531
GLYMA_02G220500	0.997731	0.0096562
GLYMA_02G222400	-2.01597	0.000388134
GLYMA_02G223000	0.868001	0.045101
GLYMA_02G225300	-1.1913	0.00688403
GLYMA_02G227800	-3.33759	0.0166559
GLYMA_02G231600	-2.38999	0.000159492
GLYMA_02G238000	0.91413	0.00447033
GLYMA_02G238200	-2.97616	0.0185793
GLYMA_02G238600	-1.03273	0.0148524
GLYMA_02G240600	-1.14888	0.0361601
GLYMA_02G241900	-2.61259	0.00365463
GLYMA_02G242900	0.696836	0.0407833
GLYMA_02G243200	-1.85615	0.0249971
GLYMA_02G244200	0.758151	0.0346334
GLYMA_02G244400	-1.97321	0.039561
GLYMA_02G248300	-2.65863	0.0433512
GLYMA_02G248400	0.800994	0.00925295
GLYMA_02G251100	-1.63099	0.000945583
GLYMA_02G253200	2.97431	0.0340566
GLYMA_02G267100	-2.02398	0.0429024
GLYMA_02G267500	-1.62822	0.0188465
GLYMA_02G271500	-1.85163	0.0343227
GLYMA_02G271900	0.735543	0.0345052
GLYMA_02G273100	-2.8462	0.0404246
GLYMA_02G273200	0.690768	0.0333505
GLYMA_02G274000	-3.53415	0.0148853
GLYMA_02G274100	-1.94742	0.0250947
GLYMA_02G274900	-2.12973	0.0347359
GLYMA_02G276100	-1.37872	0.028964
GLYMA_02G276800	0.640451	0.0457795
GLYMA_02G277500	-3.34377	0.0483042
GLYMA_02G278000	-2.32347	0.0217373
GLYMA_02G278100	-1.87642	0.0428147
GLYMA_02G281700	-2.71706	0.0244073
GLYMA_02G285700	-4.95702	0.0268594
GLYMA_02G286300	-2.05606	0.0033267
GLYMA_02G286400	-5.93526	0.00128742
GLYMA_02G287800	-2.39757	0.0124626
GLYMA_02G288000	-1.63475	0.000104632
GLYMA_02G289100	-1.37447	0.0140135
GLYMA_02G293700	-1.3085	0.0150564
GLYMA_02G296200	0.783947	0.0159178
GLYMA_02G296500	1.30782	0.0446268
GLYMA_02G297100	0.984605	0.0152234
GLYMA_02G297400	0.98333	0.0118261
GLYMA_02G298000	0.636842	0.0438468
GLYMA_02G299300	-1.7865	0.00965883
GLYMA_02G302300	-2.20965	0.0215104
GLYMA_02G308900	1.57428	0.0204634
GLYMA_02G312200	-1.51111	0.000419373
GLYMA_03G001500	-1.44566	0.0165339
GLYMA_03G002100	0.732575	0.032191
GLYMA_03G002200	0.744716	0.0431811
GLYMA_03G002400	0.628866	0.038263
GLYMA_03G003600	0.808604	0.0151185
GLYMA_03G005400	-1.4465	0.0429447
GLYMA_03G005900	0.699143	0.0383448
GLYMA_03G006500	-1.1114	0.00589914
GLYMA_03G007600	-3.18326	0.00694031
GLYMA_03G010800	0.610526	0.04172
GLYMA_03G012600	-5.98401	0.0357036
GLYMA_03G013400	0.708383	0.0425486
GLYMA_03G021400	-1.95354	0.00483577
GLYMA_03G023700	-1.33627	0.0331544
GLYMA_03G025500	-2.60747	0.00335018
GLYMA_03G033900	2.83814	0.045256
GLYMA_03G036800	-4.51538	0.0316767
GLYMA_03G039300	3.7271	0.0221409
GLYMA_03G040400	-4.69885	0.00697627
GLYMA_03G041200	0.731952	0.0274527
GLYMA_03G045900	-3.90681	0.000204315
GLYMA_03G046000	-3.04308	0.000512443
GLYMA_03G060500	-1.8378	0.016129
GLYMA_03G090100	-1.36115	0.00317852
GLYMA_03G094300	-1.17625	0.0150857
GLYMA_03G103200	-1.02913	0.0208667
GLYMA_03G109000	-1.35443	0.00567012
GLYMA_03G112200	-2.56137	0.0127144
GLYMA_03G114400	-1.07775	0.0112949
GLYMA_03G117000	-1.10575	0.00767813
GLYMA_03G130000	-1.19271	0.00226031
GLYMA_03G132900	1.70406	0.0216643
GLYMA_03G136000	-2.68027	0.0211077
GLYMA_03G137200	-1.32544	0.0318994
GLYMA_03G138200	1.56652	0.0409218
GLYMA_03G138300	2.061	0.0246083
GLYMA_03G139700	-1.45874	0.0175605
GLYMA_03G142700	-1.75726	0.0121863
GLYMA_03G143300	0.647994	0.0464252
GLYMA_03G146400	-1.48671	0.0198154
GLYMA_03G146500	-2.67527	0.0036099
GLYMA_03G148800	0.724593	0.019055
GLYMA_03G152300	0.678394	0.0321421
GLYMA_03G154500	-1.26109	0.0443699
GLYMA_03G154600	0.617747	0.0480992
GLYMA_03G161100	0.630563	0.0327428
GLYMA_03G161300	-2.10557	0.0333272
GLYMA_03G161800	0.773431	0.0434673
GLYMA_03G166100	-2.4547	0.0365496
GLYMA_03G167400	-2.2599	0.0365831
GLYMA_03G169700	-1.62356	0.0245722
GLYMA_03G170300	-1.4039	0.0431385
GLYMA_03G172300	-2.23489	0.00628292
GLYMA_03G180100	-2.17766	0.00118898
GLYMA_03G181700	-3.11332	0.000604499
GLYMA_03G186600	0.738939	0.0107037
GLYMA_03G186900	-2.91047	0.0016899
GLYMA_03G187000	0.697535	0.0428083
GLYMA_03G190800	-3.83192	0.0269953
GLYMA_03G190900	-2.83803	0.0333415
GLYMA_03G191700	-2.18234	0.00692463
GLYMA_03G192000	0.802782	0.0236008
GLYMA_03G192900	0.641029	0.0445866
GLYMA_03G193900	-1.11896	0.0221117
GLYMA_03G201600	-2.69709	0.000169778
GLYMA_03G203600	-1.34283	0.00812082
GLYMA_03G204200	-2.13987	0.00180227
GLYMA_03G204800	0.662895	0.0411668
GLYMA_03G207400	-6.18998	0.0135631
GLYMA_03G208800	-3.1147	0.0234766
GLYMA_03G212700	-1.13442	0.00565252
GLYMA_03G213100	-3.68658	0.0200811
GLYMA_03G213200	-2.50339	0.0248353
GLYMA_03G214500	0.922783	0.00486313
GLYMA_03G214700	0.657355	0.0424302
GLYMA_03G217500	0.839428	0.0482356
GLYMA_03G222500	-1.98954	0.0177155
GLYMA_03G222600	-1.58872	0.0244393
GLYMA_03G222900	0.663892	0.0283943
GLYMA_03G223800	-2.01739	0.0260278
GLYMA_03G224300	-1.47506	0.000413053
GLYMA_03G226700	-1.37604	0.000277119
GLYMA_03G228700	3.81646	0.0452566
GLYMA_03G230100	-3.89533	0.036317
GLYMA_03G232600	-1.53631	0.00114325
GLYMA_03G236500	0.844582	0.00426654
GLYMA_03G236900	0.726665	0.0121373
GLYMA_03G237200	-5.03959	0.0211301
GLYMA_03G243700	0.620329	0.0456621
GLYMA_03G247600	-5.43369	0.00570201
GLYMA_03G247700	-1.88513	0.0312865
GLYMA_03G248500	-1.01108	0.0339348
GLYMA_03G251300	-1.48778	0.000920582
GLYMA_03G251900	0.992538	0.0240238
GLYMA_03G252200	-5.03334	0.0089622
GLYMA_03G253800	-1.34186	0.00725007
GLYMA_03G256400	-2.20595	0.0413051
GLYMA_03G256900	-1.29477	0.000240682
GLYMA_03G257100	1.56418	0.035948
GLYMA_03G260400	-2.07112	0.0290866
GLYMA_03G260500	-2.05972	0.0209867
GLYMA_03G260600	0.738406	0.0339928
GLYMA_03G264500	-1.36823	0.000216185
GLYMA_04G002100	-3.33952	0.0194064
GLYMA_04G002200	0.691002	0.0267006
GLYMA_04G002500	-2.44568	0.00548661
GLYMA_04G003600	-3.50144	6.77723e-05
GLYMA_04G003700	-1.05163	0.0364688
GLYMA_04G006200	-3.78224	0.00274855
GLYMA_04G006600	-5.61077	0.00568519
GLYMA_04G007000	-2.99178	0.0240138
GLYMA_04G007100	-3.68404	0.0299359
GLYMA_04G007400	0.900997	0.0040455
GLYMA_04G007900	-1.91601	0.00286877
GLYMA_04G009200	-6.62048	0.00289602
GLYMA_04G009300	-4.58971	0.0128617
GLYMA_04G010300	-1.05802	0.00212611
GLYMA_04G011100	-1.63849	0.000149016
GLYMA_04G013400	-2.06953	0.00559593
GLYMA_04G013900	0.7319	0.0158175
GLYMA_04G014600	-1.42822	0.0030547
GLYMA_04G014700	2.26958	0.0241896
GLYMA_04G016700	-1.24838	0.0119224
GLYMA_04G021000	-1.60218	0.0196589
GLYMA_04G021100	-2.36431	0.00694011
GLYMA_04G021600	-1.66963	0.0298998
GLYMA_04G022300	3.01155	0.0361684
GLYMA_04G022600	-1.20199	0.010614
GLYMA_04G023900	-2.55771	0.0100002
GLYMA_04G026000	-1.17789	0.00200722
GLYMA_04G027000	-2.48161	0.00322659
GLYMA_04G030400	0.913932	0.00675092
GLYMA_04G032900	-3.57441	0.0154095
GLYMA_04G033200	-2.82375	0.0308318
GLYMA_04G038200	0.807029	0.0113451
GLYMA_04G040500	0.96716	0.00307702
GLYMA_04G043200	-5.82225	0.00159291
GLYMA_04G043300	-1.93732	0.0496461
GLYMA_04G043400	-4.32767	0.000470175
GLYMA_04G044200	4.74796	0.0106629
GLYMA_04G045100	0.674952	0.0294359
GLYMA_04G047800	-2.32942	0.0172694
GLYMA_04G053400	-1.47327	0.0496056
GLYMA_04G054300	-1.97459	0.0353167
GLYMA_04G055800	-2.84239	0.0435364
GLYMA_04G056800	1.48892	0.0254138
GLYMA_04G057200	-2.63652	0.0370599
GLYMA_04G059600	-1.54225	0.0450735
GLYMA_04G060400	0.807084	0.0192022
GLYMA_04G063500	0.857913	0.0464096
GLYMA_04G066700	0.6983	0.0408164
GLYMA_04G067300	0.953546	0.00217545
GLYMA_04G067700	2.4209	0.0127023
GLYMA_04G068000	-5.74769	0.00515702
GLYMA_04G068800	-1.74858	1.18069e-06
GLYMA_04G070200	1.9123	0.0489371
GLYMA_04G070300	1.23025	0.0252472
GLYMA_04G071000	-1.01822	0.0434122
GLYMA_04G071400	-4.4809	0.00340491
GLYMA_04G073500	-1.6321	0.0441991
GLYMA_04G073600	-2.12043	0.000320202
GLYMA_04G073800	-1.50709	0.0279033
GLYMA_04G076700	-2.43334	0.00593362
GLYMA_04G077700	3.63574	0.0452472
GLYMA_04G078100	0.631438	0.037613
GLYMA_04G080500	0.941162	0.00300667
GLYMA_04G083800	1.57282	0.000378316
GLYMA_04G086900	-1.42816	0.00703324
GLYMA_04G092400	0.839428	0.0255164
GLYMA_04G095500	0.889758	0.0242394
GLYMA_04G108100	-1.83645	0.0475988
GLYMA_04G108300	-1.51942	2.79691e-05
GLYMA_04G111600	-3.69654	0.00525399
GLYMA_04G114000	-3.25195	0.0129544
GLYMA_04G114300	-2.39059	0.0138568
GLYMA_04G118600	0.890748	0.03248
GLYMA_04G128800	-1.67741	0.00970725
GLYMA_04G130300	-2.87481	0.0344719
GLYMA_04G141400	0.84167	0.0290713
GLYMA_04G146700	0.976146	0.0327634
GLYMA_04G166100	-2.84049	0.04851
GLYMA_04G170000	-1.92848	0.0355273
GLYMA_04G179700	-3.02556	0.0276092
GLYMA_04G180600	-2.08461	0.00787064
GLYMA_04G184000	4.2544	0.0475383
GLYMA_04G184500	-1.13858	0.00539731
GLYMA_04G188600	-3.09118	0.0219749
GLYMA_04G189900	-3.15125	0.0218955
GLYMA_04G191100	-3.61991	0.00564778
GLYMA_04G191700	-2.19905	0.0179246
GLYMA_04G192000	-4.63176	0.0452114
GLYMA_04G194500	-1.1619	0.029739
GLYMA_04G203600	-1.02667	0.00865267
GLYMA_04G208500	0.656434	0.0334889
GLYMA_04G209600	0.800594	0.0459719
GLYMA_04G210000	-2.40402	0.000731142
GLYMA_04G213400	0.70677	0.0319645
GLYMA_04G213500	-1.00201	0.00196859
GLYMA_04G213600	0.718257	0.0465203
GLYMA_04G217300	0.851294	0.00840319
GLYMA_04G217800	1.10024	0.0224166
GLYMA_04G220200	0.900946	0.0392008
GLYMA_04G225300	-2.29378	0.0246074
GLYMA_04G225400	-2.95185	0.0456916
GLYMA_04G226300	0.743036	0.0335199
GLYMA_04G226600	-6.07557	0.00142185
GLYMA_04G226800	1.4335	0.0144624
GLYMA_04G227800	-4.59355	0.0384457
GLYMA_04G227900	-7.07099	1.06389e-05
GLYMA_04G230900	-2.36455	0.0485239
GLYMA_04G233600	-1.66915	0.00274897
GLYMA_04G235700	-1.41769	0.00436395
GLYMA_04G236500	-3.297	0.000113381
GLYMA_04G238800	-1.88368	0.00384746
GLYMA_04G239700	0.710948	0.0360665
GLYMA_05G000700	-1.24044	0.000103452
GLYMA_05G003400	0.66917	0.0362879
GLYMA_05G005600	0.802996	0.0234765
GLYMA_05G006500	-5.62107	0.00938005
GLYMA_05G006700	0.608841	0.0443602
GLYMA_05G008300	-2.73637	0.04571
GLYMA_05G011800	-2.23851	0.0495889
GLYMA_05G012700	-1.40785	0.0387508
GLYMA_05G014000	1.50292	0.0480833
GLYMA_05G014300	-1.39806	0.0390308
GLYMA_05G018500	0.773966	0.0438056
GLYMA_05G019500	-1.43228	0.00459418
GLYMA_05G019600	-2.49219	0.000806846
GLYMA_05G019700	-1.25955	0.00516085
GLYMA_05G021000	-1.88574	0.0375537
GLYMA_05G021100	1.00186	0.0139706
GLYMA_05G027800	0.944234	0.0142704
GLYMA_05G028000	-1.74471	0.000355451
GLYMA_05G028100	-1.7732	0.0333009
GLYMA_05G032300	-1.48334	0.00216101
GLYMA_05G032500	0.964873	0.00292877
GLYMA_05G032600	0.612029	0.0438653
GLYMA_05G032900	-5.17097	0.0458368
GLYMA_05G033800	-2.76747	0.0094754
GLYMA_05G044600	0.598294	0.0465119
GLYMA_05G045500	0.858382	0.0173985
GLYMA_05G046400	-1.50763	0.0120025
GLYMA_05G047800	-3.07971	0.0369809
GLYMA_05G049000	-1.00181	0.00897886
GLYMA_05G050100	-5.12886	0.0068571
GLYMA_05G050600	-2.80476	0.0441968
GLYMA_05G051500	-3.16789	0.0426253
GLYMA_05G053200	0.792847	0.0110805
GLYMA_05G053300	-1.93186	0.00182777
GLYMA_05G054700	-1.25209	0.0143817
GLYMA_05G056000	-1.80395	0.00396109
GLYMA_05G056400	-2.29534	8.14694e-05
GLYMA_05G059100	0.776958	0.0207656
GLYMA_05G062200	-1.57462	4.26172e-05
GLYMA_05G079500	-3.14316	0.00164427
GLYMA_05G089400	-1.34362	0.0392652
GLYMA_05G115000	-1.19891	0.00112551
GLYMA_05G116900	-1.83229	0.00693083
GLYMA_05G118500	0.96377	0.00901146
GLYMA_05G121200	-2.1532	0.00593212
GLYMA_05G121400	-2.28582	0.004953
GLYMA_05G122900	-4.94123	0.0116495
GLYMA_05G123100	-2.99371	0.0340423
GLYMA_05G128500	-1.97064	0.033036
GLYMA_05G130300	-4.35354	0.00060043
GLYMA_05G130400	-1.24893	0.00156184
GLYMA_05G132200	-6.06389	0.0397649
GLYMA_05G133900	2.83487	0.0212282
GLYMA_05G134800	-1.73641	0.00479945
GLYMA_05G138500	-4.70774	0.0176831
GLYMA_05G139700	-1.25701	0.00111345
GLYMA_05G139800	-5.32912	0.0186236
GLYMA_05G142500	-2.39202	0.000283306
GLYMA_05G143900	-1.63362	0.00898959
GLYMA_05G145600	-4.91635	0.00701323
GLYMA_05G146200	-4.79355	0.0240117
GLYMA_05G149500	-1.74226	0.0397257
GLYMA_05G149700	-1.50968	0.0336608
GLYMA_05G150300	-2.27418	0.0151297
GLYMA_05G150700	-2.12188	0.018489
GLYMA_05G150800	-2.51036	0.035838
GLYMA_05G151500	-1.21998	0.00977572
GLYMA_05G155200	-3.23155	0.0161302
GLYMA_05G156000	-1.47163	0.0441182
GLYMA_05G156500	-1.18139	0.0192391
GLYMA_05G156700	-3.7002	0.0115764
GLYMA_05G164800	0.60743	0.0459066
GLYMA_05G165800	-1.14748	0.00123976
GLYMA_05G172600	3.23429	0.000797635
GLYMA_05G172700	3.03678	0.0354936
GLYMA_05G172900	0.632981	0.0361261
GLYMA_05G173200	-5.56721	0.0038416
GLYMA_05G173400	0.789774	0.0152891
GLYMA_05G174400	0.901683	0.00987764
GLYMA_05G175000	-2.99037	0.000649731
GLYMA_05G176100	-1.78427	0.0403856
GLYMA_05G176300	-3.73174	0.00633161
GLYMA_05G176400	-1.91705	0.0428599
GLYMA_05G181900	-1.81403	0.00351088
GLYMA_05G183400	0.985703	0.0180324
GLYMA_05G184200	-1.25504	0.00199063
GLYMA_05G185100	-2.46874	0.0315384
GLYMA_05G186000	0.899377	0.0174518
GLYMA_05G187300	-1.02072	0.0352829
GLYMA_05G188600	-4.62612	0.0176239
GLYMA_05G200900	0.690876	0.0392824
GLYMA_05G203300	-1.98083	0.0340467
GLYMA_05G207600	0.693794	0.029943
GLYMA_05G208600	-2.54742	0.0101715
GLYMA_05G214400	-4.76339	0.0157199
GLYMA_05G221100	-3.23877	0.00632712
GLYMA_05G221600	-1.827	0.0443654
GLYMA_05G221800	-2.89378	0.0159397
GLYMA_05G223300	0.686658	0.0317111
GLYMA_05G224500	-2.48415	0.0294887
GLYMA_05G225100	0.913333	0.00714836
GLYMA_05G235400	0.977813	0.00295132
GLYMA_05G236800	-5.51329	0.00673318
GLYMA_05G238700	-1.27853	0.00270975
GLYMA_05G240000	-1.92227	0.0390232
GLYMA_05G241100	-1.342	0.00395445
GLYMA_05G241600	-1.62778	0.00336828
GLYMA_05G242000	0.90727	0.00862682
GLYMA_05G243400	0.868124	0.0127683
GLYMA_05G244200	-3.98101	0.00227471
GLYMA_05G244300	-2.12976	0.00623957
GLYMA_06G001700	-1.64245	0.000687269
GLYMA_06G001800	0.944618	0.0397601
GLYMA_06G003300	0.649157	0.0262326
GLYMA_06G006200	-6.47682	0.000478129
GLYMA_06G007500	-1.76354	0.000738336
GLYMA_06G009500	-1.45154	0.0422778
GLYMA_06G010600	-1.21434	0.000808503
GLYMA_06G012700	0.870114	0.00588615
GLYMA_06G014300	-1.38139	0.00277049
GLYMA_06G015000	-1.35944	0.00092912
GLYMA_06G017900	-4.63428	0.0427155
GLYMA_06G018300	-1.11084	0.0133007
GLYMA_06G018500	1.07713	0.0249744
GLYMA_06G020700	-1.20492	0.0363138
GLYMA_06G024100	-1.49463	0.00342835
GLYMA_06G025500	-1.9172	0.00595047
GLYMA_06G025600	0.61171	0.0410891
GLYMA_06G025800	0.827402	0.0188874
GLYMA_06G027000	-4.99827	0.00643901
GLYMA_06G029000	0.852578	0.0495775
GLYMA_06G029200	-1.77532	0.0374857
GLYMA_06G030100	4.68853	0.00688921
GLYMA_06G032800	-1.36243	0.0241976
GLYMA_06G036000	1.03096	0.0114638
GLYMA_06G036300	0.85839	0.0303403
GLYMA_06G037900	3.79866	0.023036
GLYMA_06G039600	-1.12479	0.00413963
GLYMA_06G041100	0.735947	0.0468542
GLYMA_06G042700	-4.68747	0.0263807
GLYMA_06G046600	0.927638	0.0471864
GLYMA_06G047100	-2.58153	0.0145459
GLYMA_06G052000	-4.84023	0.0112635
GLYMA_06G054200	-2.06224	0.0160209
GLYMA_06G054300	-2.7341	3.65159e-05
GLYMA_06G060500	-2.07686	0.0100409
GLYMA_06G060600	0.694631	0.0220376
GLYMA_06G061500	-5.18751	0.0286606
GLYMA_06G065400	-2.06189	0.0140199
GLYMA_06G069200	-4.55381	0.0453055
GLYMA_06G069600	-9.61833	0.00204146
GLYMA_06G069700	-3.26104	0.0466817
GLYMA_06G070300	-1.10825	0.00100324
GLYMA_06G073100	-1.94036	5.07637e-05
GLYMA_06G073900	0.824641	0.0128446
GLYMA_06G074700	0.613803	0.0357498
GLYMA_06G074900	-1.67685	0.0160357
GLYMA_06G081400	-4.05721	0.00391564
GLYMA_06G083800	-6.33994	0.00498631
GLYMA_06G085200	0.899495	0.0133634
GLYMA_06G090300	1.90933	0.000433451
GLYMA_06G096900	0.981698	0.0293262
GLYMA_06G100500	-2.36316	0.00999666
GLYMA_06G100700	1.56807	0.0133173
GLYMA_06G102400	0.694249	0.0255379
GLYMA_06G103000	-6.20067	0.0435983
GLYMA_06G105800	-2.91839	0.0376399
GLYMA_06G108900	-1.40055	0.0362021
GLYMA_06G112100	-1.04128	0.0297151
GLYMA_06G112300	-2.88754	0.0145887
GLYMA_06G113500	0.717515	0.0383492
GLYMA_06G113600	-2.71683	0.000982032
GLYMA_06G116000	3.22031	0.031648
GLYMA_06G122400	0.726865	0.0366656
GLYMA_06G123800	-3.53957	0.00265538
GLYMA_06G125700	-1.16401	0.0109883
GLYMA_06G126700	0.665104	0.0385141
GLYMA_06G126800	-1.139	0.038985
GLYMA_06G135000	0.631847	0.043421
GLYMA_06G135100	0.767638	0.0300241
GLYMA_06G135200	-1.49792	1.0043e-05
GLYMA_06G136100	-1.1651	0.0497594
GLYMA_06G136400	-3.08882	0.0139696
GLYMA_06G137800	-1.38778	5.73103e-05
GLYMA_06G137900	-1.35384	0.000180326
GLYMA_06G138100	-1.44144	0.000199831
GLYMA_06G138200	0.883747	0.0361639
GLYMA_06G139200	2.33975	0.00743498
GLYMA_06G140200	-1.02448	0.00191578
GLYMA_06G141700	-1.27673	0.00214339
GLYMA_06G143200	-1.16768	0.0144608
GLYMA_06G145900	0.985352	0.00190687
GLYMA_06G146700	0.98852	0.0186479
GLYMA_06G147800	0.859244	0.0312815
GLYMA_06G148300	0.737192	0.0238074
GLYMA_06G151300	0.781872	0.0315786
GLYMA_06G159200	0.698092	0.0285428
GLYMA_06G161100	-1.06238	0.00213581
GLYMA_06G161700	0.85931	0.0102391
GLYMA_06G162700	0.692432	0.0159639
GLYMA_06G163100	-5.00546	0.0154971
GLYMA_06G163200	-6.36215	0.00079702
GLYMA_06G164100	2.19255	0.0221208
GLYMA_06G165000	-2.49011	0.0106046
GLYMA_06G166700	-3.49306	0.0358535
GLYMA_06G170800	-2.03253	0.0361217
GLYMA_06G171000	0.769917	0.024924
GLYMA_06G171700	-1.38303	0.0179738
GLYMA_06G179000	-1.52124	0.000270506
GLYMA_06G183500	4.13987	0.0460129
GLYMA_06G193600	-1.31551	0.00284852
GLYMA_06G204000	-4.58137	0.020129
GLYMA_06G204300	-3.37069	0.00187101
GLYMA_06G211800	-2.81287	0.0334186
GLYMA_06G228700	0.905	0.00470815
GLYMA_06G233700	0.759353	0.0446094
GLYMA_06G233900	4.16323	0.0353293
GLYMA_06G236100	-1.38053	0.0163628
GLYMA_06G240900	3.54507	0.0246301
GLYMA_06G265500	-2.86762	0.0241574
GLYMA_06G283900	-2.48741	0.0352727
GLYMA_06G294000	-3.24411	0.00604927
GLYMA_06G294300	-1.96721	0.0390172
GLYMA_06G295000	-2.78785	0.0422483
GLYMA_06G295400	-4.4276	0.0254261
GLYMA_06G296500	0.904579	0.00680787
GLYMA_06G305600	-3.14286	0.00418226
GLYMA_06G308700	-1.59387	0.00287606
GLYMA_06G308800	-2.08122	0.0314547
GLYMA_06G309000	-2.52013	0.0219243
GLYMA_06G310900	2.89427	0.049019
GLYMA_06G311600	0.997789	0.0190671
GLYMA_06G312900	0.971863	0.0358476
GLYMA_06G313700	1.04086	0.00376086
GLYMA_06G314300	0.894952	0.0206612
GLYMA_06G314600	-3.62861	0.0411567
GLYMA_06G314900	-2.48779	1.4018e-05
GLYMA_06G317700	-1.74414	0.00252092
GLYMA_06G317800	-1.30062	0.00091302
GLYMA_06G318100	0.755306	0.0364981
GLYMA_06G318400	0.769034	0.0158143
GLYMA_07G002600	0.611502	0.0359795
GLYMA_07G004600	-1.85568	0.00951755
GLYMA_07G004900	-2.0917	0.0241877
GLYMA_07G005000	-1.7131	0.0186889
GLYMA_07G009600	-2.7445	0.032599
GLYMA_07G009700	4.1455	0.0385305
GLYMA_07G012800	-1.92602	0.0192149
GLYMA_07G014600	-5.54421	0.0284786
GLYMA_07G014800	-2.80463	0.00763316
GLYMA_07G015200	-2.50845	0.00318512
GLYMA_07G015400	-1.06453	0.0329043
GLYMA_07G017600	1.44051	0.0486482
GLYMA_07G019000	-1.63409	0.0130653
GLYMA_07G019100	0.669767	0.0365244
GLYMA_07G019500	2.71802	0.0173862
GLYMA_07G020100	-2.20531	0.0245739
GLYMA_07G020800	0.691245	0.0291181
GLYMA_07G023000	-2.46323	0.00698917
GLYMA_07G025000	-1.5229	0.0156396
GLYMA_07G029100	-1.1215	0.0463928
GLYMA_07G030500	2.1219	0.0480057
GLYMA_07G030700	-2.32825	0.0260361
GLYMA_07G034100	-2.56724	0.00889975
GLYMA_07G036100	0.896758	0.0152388
GLYMA_07G043400	3.07376	0.0279167
GLYMA_07G043700	-1.81243	0.030832
GLYMA_07G046000	0.940078	0.0066614
GLYMA_07G046500	-1.00445	0.0319242
GLYMA_07G046800	0.596851	0.0415846
GLYMA_07G047500	0.922374	0.0299651
GLYMA_07G047600	-1.3869	0.000869959
GLYMA_07G049000	-4.99873	0.0194002
GLYMA_07G053900	-1.21672	0.00469687
GLYMA_07G056500	-2.11386	0.029522
GLYMA_07G056900	-2.63619	0.000287507
GLYMA_07G057200	-1.00757	0.0422206
GLYMA_07G059400	-2.20151	0.0133322
GLYMA_07G059600	-2.46878	0.00976105
GLYMA_07G059800	0.602505	0.048697
GLYMA_07G065600	0.894237	0.0241525
GLYMA_07G068800	-1.34438	0.0434508
GLYMA_07G072100	-1.30688	0.0203884
GLYMA_07G073100	-1.00673	0.0419062
GLYMA_07G073200	2.36616	0.0168989
GLYMA_07G075200	-2.89044	0.0115162
GLYMA_07G077900	-2.00096	0.0135869
GLYMA_07G081400	0.733288	0.03326
GLYMA_07G082700	0.713009	0.0173162
GLYMA_07G082800	-5.09507	0.00788861
GLYMA_07G083400	-3.57755	0.0114155
GLYMA_07G085000	5.00262	0.0276231
GLYMA_07G091200	-1.06373	0.00249517
GLYMA_07G096200	-3.21169	0.0260316
GLYMA_07G099400	-1.12351	0.0236249
GLYMA_07G100700	-1.42039	0.0101814
GLYMA_07G101900	0.744998	0.0279979
GLYMA_07G105900	-1.691	0.0499921
GLYMA_07G118100	-1.8108	0.00324247
GLYMA_07G118300	-1.5126	0.00044425
GLYMA_07G119600	-1.99582	5.04631e-05
GLYMA_07G119700	-1.62671	0.0292845
GLYMA_07G123300	-2.53446	0.0392476
GLYMA_07G125800	-1.29226	0.00113968
GLYMA_07G130400	0.666034	0.0313879
GLYMA_07G133900	-1.37107	0.00417902
GLYMA_07G137100	-1.53765	0.0440938
GLYMA_07G137200	-1.97311	0.036806
GLYMA_07G139000	0.934491	0.0264799
GLYMA_07G147700	0.719856	0.0416896
GLYMA_07G151900	-1.33321	0.00560318
GLYMA_07G155400	0.677176	0.0496672
GLYMA_07G179400	-7.33955	0.000911054
GLYMA_07G180000	-6.59683	0.00633966
GLYMA_07G182200	-1.23238	0.00597143
GLYMA_07G185400	2.55816	0.0455092
GLYMA_07G188800	-1.75758	0.029495
GLYMA_07G190300	0.895901	0.00323843
GLYMA_07G194000	0.659185	0.032904
GLYMA_07G199800	-1.09653	0.0280128
GLYMA_07G200500	3.51963	0.0361071
GLYMA_07G201900	0.937683	0.0116758
GLYMA_07G205000	-1.77712	0.0343111
GLYMA_07G205700	-4.73508	0.0233712
GLYMA_07G209600	-1.58467	0.0114998
GLYMA_07G217800	-1.31041	0.00516628
GLYMA_07G224400	0.926788	0.0272464
GLYMA_07G225100	-1.6924	0.00297882
GLYMA_07G227100	-3.70342	0.00291009
GLYMA_07G231000	-1.75034	0.0017807
GLYMA_07G233000	1.05106	0.0411205
GLYMA_07G238000	-1.64236	0.000555497
GLYMA_07G244000	-1.17441	0.00821862
GLYMA_07G245000	-4.13103	0.040073
GLYMA_07G248900	-1.394	0.0070298
GLYMA_07G249400	0.67274	0.0306206
GLYMA_07G252600	-1.81595	0.0479385
GLYMA_07G255200	-2.4471	0.00259651
GLYMA_07G255300	-2.07953	0.00363698
GLYMA_07G255500	-1.94481	0.00117362
GLYMA_07G255900	-2.20051	0.0300244
GLYMA_07G258400	-4.10815	0.0401873
GLYMA_07G259300	0.708353	0.0411467
GLYMA_07G259500	-1.94017	0.0330006
GLYMA_07G260000	-1.43429	0.00864738
GLYMA_07G262200	-4.20972	0.0449908
GLYMA_07G263800	-1.80537	0.0495217
GLYMA_07G265100	-1.65653	0.0440977
GLYMA_07G267700	0.673717	0.0297178
GLYMA_07G268700	-1.91511	0.00798563
GLYMA_07G269200	-1.68113	0.0314833
GLYMA_07G274200	-3.21428	0.0311682
GLYMA_08G000800	1.09901	0.0241653
GLYMA_08G001900	0.948589	0.0223197
GLYMA_08G005500	-1.06603	0.0349907
GLYMA_08G010600	-1.30038	0.00225512
GLYMA_08G010700	-1.69298	0.0178618
GLYMA_08G010800	-5.42391	0.00221297
GLYMA_08G011100	-1.51016	0.043025
GLYMA_08G013000	0.663986	0.0279272
GLYMA_08G013200	0.628548	0.0391386
GLYMA_08G013300	-1.55707	0.00138404
GLYMA_08G014000	-1.33559	0.0213028
GLYMA_08G014500	0.928022	0.0157431
GLYMA_08G014600	-2.34424	0.00105049
GLYMA_08G017500	-1.50112	0.0211472
GLYMA_08G018100	-1.25216	0.00895084
GLYMA_08G018200	-1.03209	0.011321
GLYMA_08G018800	-2.41821	0.00724519
GLYMA_08G019600	0.758715	0.0313754
GLYMA_08G020200	-2.9875	0.0361319
GLYMA_08G020600	0.58776	0.0466507
GLYMA_08G020800	-1.40404	0.0302485
GLYMA_08G020900	-3.864	0.0455073
GLYMA_08G021000	-1.22389	0.000262849
GLYMA_08G021600	-2.25729	0.0135407
GLYMA_08G022100	-2.54447	0.000707549
GLYMA_08G026200	-3.19166	0.000359102
GLYMA_08G027300	-1.47253	0.00608575
GLYMA_08G028300	-1.34624	0.0413799
GLYMA_08G030500	-1.23224	0.000818005
GLYMA_08G031000	0.825477	0.0222315
GLYMA_08G031900	4.67861	0.0077061
GLYMA_08G032600	-1.22249	0.0180904
GLYMA_08G033000	-3.74699	0.00734384
GLYMA_08G037700	-3.48294	0.000145604
GLYMA_08G043600	-3.52293	0.0253541
GLYMA_08G044300	-1.23791	0.0130683
GLYMA_08G047000	-1.15222	0.023058
GLYMA_08G047800	-2.1457	0.000453308
GLYMA_08G049000	0.675551	0.0185151
GLYMA_08G051500	-2.17541	0.0423707
GLYMA_08G052200	-2.39209	0.000589783
GLYMA_08G052300	-2.07993	0.0149704
GLYMA_08G054400	-1.34859	0.0184289
GLYMA_08G056100	0.624251	0.0402745
GLYMA_08G062700	-2.5755	0.00669284
GLYMA_08G065100	-1.36614	0.0420505
GLYMA_08G069000	1.55221	0.00604912
GLYMA_08G069200	1.81315	0.0248856
GLYMA_08G072700	-1.28814	0.000488062
GLYMA_08G075700	-1.61991	0.0441703
GLYMA_08G075900	-1.22993	0.00268789
GLYMA_08G082500	0.623694	0.0476908
GLYMA_08G084500	-2.71268	0.0165266
GLYMA_08G084600	-4.0464	8.42717e-07
GLYMA_08G087100	-1.75355	0.0154453
GLYMA_08G087500	-1.02625	0.00218028
GLYMA_08G087900	-1.64748	0.00596766
GLYMA_08G088900	0.989836	0.0136659
GLYMA_08G089100	-1.90576	0.0280684
GLYMA_08G089700	-2.41074	0.0342373
GLYMA_08G090100	-2.72095	0.0391349
GLYMA_08G091800	-2.50731	0.0205915
GLYMA_08G094800	-1.45177	0.00224899
GLYMA_08G096900	-1.68468	0.000715171
GLYMA_08G097600	-6.15663	0.00297413
GLYMA_08G099900	-2.5876	0.0119853
GLYMA_08G101300	-1.05146	0.0162197
GLYMA_08G102300	-2.12865	0.0314017
GLYMA_08G103700	-1.43599	0.00229925
GLYMA_08G104200	-1.18373	0.000609097
GLYMA_08G105400	0.815323	0.0284564
GLYMA_08G105900	0.99601	0.00115035
GLYMA_08G111400	0.770417	0.0454875
GLYMA_08G113600	0.61257	0.0467906
GLYMA_08G114100	-1.9294	0.00497751
GLYMA_08G114200	-2.21325	0.0171898
GLYMA_08G114800	-1.60545	0.017118
GLYMA_08G117200	-1.3671	0.0127312
GLYMA_08G121900	-1.41704	0.00248089
GLYMA_08G123100	-2.62961	0.0277168
GLYMA_08G123200	-1.31879	0.00487808
GLYMA_08G123400	1.92151	0.0104333
GLYMA_08G124100	-2.93551	0.0282144
GLYMA_08G132600	-1.67232	0.019506
GLYMA_08G135700	1.51481	0.0314079
GLYMA_08G139600	5.22748	0.00138553
GLYMA_08G143600	-2.6984	0.00110296
GLYMA_08G143700	-2.64283	0.0147823
GLYMA_08G143800	-2.9373	0.0140536
GLYMA_08G144700	-3.31061	0.032641
GLYMA_08G145400	-1.78901	0.00689378
GLYMA_08G147300	-3.80062	0.0418779
GLYMA_08G147900	2.34796	0.0272714
GLYMA_08G150200	-2.50292	0.0115873
GLYMA_08G150800	-3.62739	0.0121078
GLYMA_08G152500	-2.14701	0.012933
GLYMA_08G152700	-1.9285	0.00659467
GLYMA_08G155800	-1.23974	0.0405097
GLYMA_08G156700	-4.5716	0.0254893
GLYMA_08G156800	-2.93721	0.0228525
GLYMA_08G162300	-1.54884	9.31901e-05
GLYMA_08G168200	-1.48076	0.0452084
GLYMA_08G171300	1.2184	0.0242001
GLYMA_08G172300	0.751516	0.0309273
GLYMA_08G173200	0.624135	0.028044
GLYMA_08G173600	-1.12825	0.00171738
GLYMA_08G175500	-1.43847	0.00903119
GLYMA_08G176400	-1.20911	0.00245116
GLYMA_08G178100	-1.99425	0.0163394
GLYMA_08G180400	0.755741	0.0117561
GLYMA_08G182500	-1.04671	0.00154352
GLYMA_08G182800	0.799495	0.0153222
GLYMA_08G185600	-2.91443	0.0460216
GLYMA_08G185700	-1.16886	0.0408047
GLYMA_08G188200	0.986687	0.0363959
GLYMA_08G190800	-1.68375	0.00116182
GLYMA_08G192600	-1.36828	0.00122115
GLYMA_08G193500	-3.58361	0.028502
GLYMA_08G194800	0.660265	0.0264565
GLYMA_08G194900	-1.52953	0.0289815
GLYMA_08G195200	-1.01681	0.00379427
GLYMA_08G199200	1.7814	0.00975754
GLYMA_08G199900	0.958916	0.0023479
GLYMA_08G205300	-1.05796	0.00475981
GLYMA_08G205400	0.679829	0.049702
GLYMA_08G209600	0.861205	0.0108257
GLYMA_08G210600	0.793181	0.0241282
GLYMA_08G211500	-1.23989	0.0051193
GLYMA_08G212500	0.865464	0.00915953
GLYMA_08G215800	-2.08166	0.0366906
GLYMA_08G217900	-2.09752	0.000495167
GLYMA_08G218400	-1.61878	0.00329973
GLYMA_08G220200	0.763158	0.0429116
GLYMA_08G223100	-1.26728	0.00105232
GLYMA_08G223200	-1.13568	0.00347036
GLYMA_08G225300	0.68198	0.0243409
GLYMA_08G225800	-2.59666	0.0499096
GLYMA_08G226100	0.639252	0.0346311
GLYMA_08G235500	-3.09546	0.0328735
GLYMA_08G236800	-1.44823	0.00666432
GLYMA_08G245600	1.17392	0.041326
GLYMA_08G247200	0.940181	0.00360705
GLYMA_08G250200	0.770348	0.0100031
GLYMA_08G265300	-2.12209	0.0296669
GLYMA_08G281400	-7.75091	0.0268799
GLYMA_08G285800	-5.60207	0.00148203
GLYMA_08G287200	-3.53772	0.0238882
GLYMA_08G287800	-1.96652	0.0257555
GLYMA_08G289100	-2.19763	0.0137838
GLYMA_08G291800	-1.24519	0.0328195
GLYMA_08G293900	0.866624	0.0082119
GLYMA_08G296000	-3.07574	0.0462714
GLYMA_08G297200	-1.56372	0.000802087
GLYMA_08G299300	-3.6425	0.0269886
GLYMA_08G299500	-1.61812	0.0241735
GLYMA_08G300100	-2.41278	0.000172363
GLYMA_08G303300	-5.34593	0.0103162
GLYMA_08G306200	0.884527	0.0382991
GLYMA_08G309800	0.85022	0.0181017
GLYMA_08G310800	-1.16201	0.0097301
GLYMA_08G311500	-3.53274	0.016887
GLYMA_08G313200	-1.97007	0.024746
GLYMA_08G313500	0.701687	0.0204481
GLYMA_08G313800	5.45677	0.00421168
GLYMA_08G314100	-2.52387	0.0499907
GLYMA_08G314600	-1.75408	0.0427847
GLYMA_08G316100	0.680991	0.0369935
GLYMA_08G316400	0.610836	0.0447432
GLYMA_08G317300	-1.18853	0.0118586
GLYMA_08G319000	0.793563	0.0174293
GLYMA_08G319100	-1.81909	0.041881
GLYMA_08G321500	1.73079	0.0313256
GLYMA_08G321700	-2.36967	0.00303087
GLYMA_08G322600	-5.02708	0.0280364
GLYMA_08G323500	-1.53011	0.0253814
GLYMA_08G325700	-1.23793	0.0128639
GLYMA_08G326000	3.27842	0.0182589
GLYMA_08G326200	1.11969	0.0163849
GLYMA_08G327800	-5.20314	0.00483197
GLYMA_08G327900	-1.82917	0.022671
GLYMA_08G332900	-1.34182	0.0411956
GLYMA_08G336200	-4.14311	0.0272921
GLYMA_08G338300	-2.0312	0.0300183
GLYMA_08G338400	-2.00922	0.0272161
GLYMA_08G339000	-2.84587	0.015237
GLYMA_08G339500	-1.20112	0.00637296
GLYMA_08G339600	-1.22059	0.00105593
GLYMA_08G340200	-1.14536	0.000729071
GLYMA_08G341500	-2.84519	0.000415431
GLYMA_08G345600	-1.96865	0.0248382
GLYMA_08G345700	-2.25864	0.0334705
GLYMA_08G345900	-4.11441	0.00100148
GLYMA_08G347200	-1.47062	0.0369043
GLYMA_08G348300	0.627953	0.0359797
GLYMA_08G352000	-2.28905	0.0359618
GLYMA_08G354800	0.733818	0.0227731
GLYMA_08G354900	0.797425	0.0206361
GLYMA_08G356000	0.885476	0.0113433
GLYMA_08G357500	0.847046	0.0421924
GLYMA_08G357600	0.717696	0.0491484
GLYMA_08G359700	-1.75778	0.0110932
GLYMA_08G360000	-4.39157	0.0290424
GLYMA_09G000700	-1.31933	0.000689733
GLYMA_09G001000	-1.34448	0.00108304
GLYMA_09G002700	0.700223	0.0224161
GLYMA_09G003000	-2.29336	0.00208651
GLYMA_09G005800	3.13057	0.0313391
GLYMA_09G007900	0.977785	0.0427146
GLYMA_09G008800	-1.32309	0.000655089
GLYMA_09G013100	0.741182	0.0123661
GLYMA_09G013700	1.143	0.0432721
GLYMA_09G013800	-5.1288	0.00946073
GLYMA_09G014000	-3.09307	0.0347839
GLYMA_09G016500	-2.87538	0.0168242
GLYMA_09G017000	0.597945	0.0462072
GLYMA_09G021600	-4.75526	0.0434469
GLYMA_09G022900	-3.46838	0.0263609
GLYMA_09G023600	-1.87118	0.0219393
GLYMA_09G023800	-1.41281	8.77221e-05
GLYMA_09G023900	-1.40981	0.000398066
GLYMA_09G024800	-1.14935	0.00220284
GLYMA_09G024900	-1.57032	0.000369992
GLYMA_09G028500	-1.4428	0.0276814
GLYMA_09G029600	-1.52448	0.0265472
GLYMA_09G031400	-1.01802	0.0258523
GLYMA_09G034800	-1.1052	0.000596386
GLYMA_09G035400	0.676767	0.023057
GLYMA_09G043000	1.06565	0.0278512
GLYMA_09G044700	-1.98504	0.00283772
GLYMA_09G045000	-1.4176	0.0270993
GLYMA_09G051800	-1.79666	0.0014029
GLYMA_09G054000	-1.0747	0.0345664
GLYMA_09G061300	-2.86462	0.00371149
GLYMA_09G065300	0.842994	0.0297667
GLYMA_09G077400	-2.06911	0.00704204
GLYMA_09G081400	0.961799	0.0213788
GLYMA_09G084300	-1.68637	0.0238395
GLYMA_09G090400	-1.64795	0.00137336
GLYMA_09G099900	1.20457	0.00180839
GLYMA_09G137000	-2.26147	0.0221796
GLYMA_09G139100	0.901489	0.0348525
GLYMA_09G145400	-2.72107	0.0169147
GLYMA_09G147300	-5.46562	0.00391433
GLYMA_09G157300	0.946969	0.0200905
GLYMA_09G160900	0.850881	0.0351369
GLYMA_09G163000	-2.27376	0.00797051
GLYMA_09G164200	-3.57963	0.0472856
GLYMA_09G168700	0.937424	0.0317811
GLYMA_09G170600	-1.13219	0.00860461
GLYMA_09G172600	0.663658	0.0386032
GLYMA_09G175100	0.788259	0.0319728
GLYMA_09G176700	-4.75297	0.0381664
GLYMA_09G178000	-1.70856	0.00687988
GLYMA_09G182700	-1.34175	0.0225871
GLYMA_09G187400	-1.91702	0.0309552
GLYMA_09G192700	-1.32703	0.000956657
GLYMA_09G196000	0.70887	0.0316999
GLYMA_09G199100	0.980042	0.0155736
GLYMA_09G201300	0.800077	0.0201543
GLYMA_09G202400	0.760629	0.0350012
GLYMA_09G207800	-2.33534	0.0198527
GLYMA_09G212100	-1.17807	0.0187989
GLYMA_09G214400	-1.60583	0.00237279
GLYMA_09G215100	-2.24597	7.34285e-05
GLYMA_09G217200	-2.51801	0.018774
GLYMA_09G218100	-3.85197	0.0418622
GLYMA_09G218200	-4.43871	0.00179567
GLYMA_09G224300	0.828472	0.0352425
GLYMA_09G228800	0.740098	0.0419879
GLYMA_09G230400	-1.87747	0.0128784
GLYMA_09G232300	-1.06175	0.00117699
GLYMA_09G234200	0.727131	0.0148363
GLYMA_09G236500	4.53924	0.0152567
GLYMA_09G243000	-3.42788	0.0147176
GLYMA_09G248300	-1.32628	0.0162787
GLYMA_09G249700	0.873549	0.00827199
GLYMA_09G253600	-3.12946	0.0162565
GLYMA_09G253700	-5.58357	0.0192253
GLYMA_09G253900	0.630303	0.0393077
GLYMA_09G254700	-1.75959	0.00252049
GLYMA_09G255500	-5.79546	0.0035737
GLYMA_09G257300	0.938511	0.0259699
GLYMA_09G258400	0.97284	0.0169716
GLYMA_09G258700	2.33377	0.0109995
GLYMA_09G259500	-5.77381	0.00912534
GLYMA_09G262800	-2.27695	0.00143598
GLYMA_09G266600	-1.24659	0.01753
GLYMA_09G267500	-5.27351	6.03444e-07
GLYMA_09G268300	-1.8679	0.0445134
GLYMA_09G268400	0.717502	0.0335263
GLYMA_09G273400	-1.80106	0.0406286
GLYMA_09G273900	-1.52035	0.0291589
GLYMA_09G274300	-2.15206	0.0151206
GLYMA_09G275200	0.890303	0.029686
GLYMA_09G275300	-3.04383	0.00481645
GLYMA_09G275400	-2.26632	0.0412126
GLYMA_09G275700	-4.59574	0.0419586
GLYMA_09G278600	-1.44283	0.000249723
GLYMA_09G286000	1.31357	0.0343962
GLYMA_10G001500	-3.2751	0.0176476
GLYMA_10G002400	-1.96002	0.013277
GLYMA_10G002700	-3.09887	0.0357715
GLYMA_10G003800	-1.14812	0.0143975
GLYMA_10G004200	-3.02335	0.0490497
GLYMA_10G004300	-1.8549	0.00153102
GLYMA_10G004700	-1.19736	0.0119219
GLYMA_10G006200	-2.07228	0.030538
GLYMA_10G007000	-2.5072	0.00152507
GLYMA_10G011700	-1.68798	3.6524e-05
GLYMA_10G012200	0.884035	0.0251408
GLYMA_10G016000	0.605932	0.0451604
GLYMA_10G016200	-1.02207	0.00242759
GLYMA_10G018000	-2.68551	0.00767775
GLYMA_10G022400	1.16325	0.00436189
GLYMA_10G025400	0.842428	0.038242
GLYMA_10G026000	0.777769	0.0239677
GLYMA_10G026400	-1.13027	0.00981949
GLYMA_10G026500	-1.1885	0.0165578
GLYMA_10G031100	-4.0706	0.00426399
GLYMA_10G033700	-1.06414	0.00915334
GLYMA_10G035300	-1.37278	0.0291434
GLYMA_10G035800	-4.70369	7.61721e-05
GLYMA_10G037300	-2.20966	1.77128e-06
GLYMA_10G038100	0.700189	0.0341444
GLYMA_10G038300	0.75055	0.042719
GLYMA_10G039700	-1.76462	0.00785123
GLYMA_10G040100	-1.58712	0.043917
GLYMA_10G048400	-1.85612	0.0283688
GLYMA_10G049400	0.840836	0.0190389
GLYMA_10G049600	0.592413	0.0402049
GLYMA_10G053500	-2.19283	0.0098476
GLYMA_10G062600	1.42633	0.0352134
GLYMA_10G064100	-3.60048	0.0133185
GLYMA_10G065300	-3.75095	0.029022
GLYMA_10G066300	-1.13975	0.0021741
GLYMA_10G074700	-2.78096	0.027439
GLYMA_10G091400	-1.87415	0.043192
GLYMA_10G104500	-1.02574	0.00706008
GLYMA_10G106500	0.754954	0.0101641
GLYMA_10G107400	-3.99488	0.00306872
GLYMA_10G117200	-2.59945	0.0117291
GLYMA_10G119900	1.24102	0.00194519
GLYMA_10G120000	0.855	0.0312001
GLYMA_10G120400	0.896842	0.0186682
GLYMA_10G133700	-2.11017	0.00916168
GLYMA_10G134400	0.632938	0.0321368
GLYMA_10G134500	-1.74178	0.00322039
GLYMA_10G139800	1.37411	0.0463152
GLYMA_10G142000	0.750737	0.0372206
GLYMA_10G146000	1.91299	0.0256189
GLYMA_10G148700	-1.52629	0.00191376
GLYMA_10G149500	0.725657	0.0481148
GLYMA_10G152900	-1.06348	0.00192181
GLYMA_10G156600	-2.97003	0.044266
GLYMA_10G156900	0.597124	0.0445591
GLYMA_10G158700	-3.52986	0.000179616
GLYMA_10G158800	-1.66544	0.0303843
GLYMA_10G159300	0.806768	0.00896931
GLYMA_10G162800	0.599914	0.0464573
GLYMA_10G164500	0.772861	0.013874
GLYMA_10G164600	0.745491	0.019174
GLYMA_10G165000	-3.35457	0.0341336
GLYMA_10G168600	0.706197	0.0263468
GLYMA_10G170200	0.660285	0.0282523
GLYMA_10G171300	0.935652	0.0061866
GLYMA_10G175400	0.861694	0.0235394
GLYMA_10G185800	0.648935	0.0286187
GLYMA_10G186900	-2.96359	0.00423955
GLYMA_10G189100	-1.76768	0.0345907
GLYMA_10G190700	-2.23192	0.0182125
GLYMA_10G192600	0.883206	0.0135219
GLYMA_10G194200	-2.60691	0.0402566
GLYMA_10G194400	1.02282	0.00112051
GLYMA_10G198000	-1.28256	0.0496765
GLYMA_10G201900	0.945979	0.0184616
GLYMA_10G210700	-1.14396	0.00924212
GLYMA_10G213400	0.669643	0.0282783
GLYMA_10G219100	-2.24422	0.00730326
GLYMA_10G221300	-3.07982	0.0452371
GLYMA_10G222900	-1.60524	0.0205049
GLYMA_10G224500	-2.50764	0.0182326
GLYMA_10G227900	-1.34466	0.0267584
GLYMA_10G232700	-1.39798	0.000105973
GLYMA_10G233200	-3.68396	0.0154592
GLYMA_10G234500	-1.30906	0.000942936
GLYMA_10G236400	-2.23138	0.0294538
GLYMA_10G244900	-2.87554	0.0205917
GLYMA_10G246300	-5.55949	0.00229312
GLYMA_10G249400	-1.10235	0.0173975
GLYMA_10G250100	0.819886	0.0200088
GLYMA_10G251100	0.600653	0.0412323
GLYMA_10G262400	-6.73989	0.00918497
GLYMA_10G264200	-2.94236	0.00191587
GLYMA_10G264300	-2.07081	0.00392301
GLYMA_10G264900	-3.26016	0.000387402
GLYMA_10G268000	-1.22475	0.0295201
GLYMA_10G273700	0.803999	0.0218661
GLYMA_10G277100	-2.47736	0.0201109
GLYMA_10G277500	0.828604	0.00975274
GLYMA_10G278800	-1.52616	0.0333191
GLYMA_10G279800	-1.94592	0.00383253
GLYMA_10G283100	1.97475	0.0361988
GLYMA_10G284000	-6.953	0.00402169
GLYMA_10G284700	-4.49047	0.0295252
GLYMA_10G284800	-1.27931	0.0162995
GLYMA_10G285900	-3.36569	0.000116721
GLYMA_10G289700	-3.05654	0.038573
GLYMA_10G291300	-2.33398	0.00253423
GLYMA_10G292300	-1.62104	0.00711402
GLYMA_10G297800	0.665775	0.0278844
GLYMA_11G001400	0.969316	0.00234695
GLYMA_11G002500	1.57831	0.0341226
GLYMA_11G005800	0.589755	0.047804
GLYMA_11G006100	-3.48484	0.0107402
GLYMA_11G006500	-1.82446	0.0127834
GLYMA_11G011200	0.587181	0.0424342
GLYMA_11G011300	0.801512	0.0122007
GLYMA_11G011800	0.714429	0.0166047
GLYMA_11G012300	-3.39147	0.000418743
GLYMA_11G013700	0.660281	0.0322442
GLYMA_11G014200	-2.19515	0.0440867
GLYMA_11G014300	-2.14884	0.045345
GLYMA_11G015200	0.95124	0.00575153
GLYMA_11G016300	1.15572	0.009157
GLYMA_11G018800	-1.96626	0.00496781
GLYMA_11G019400	-1.15825	0.00103357
GLYMA_11G019600	-2.23604	0.00389322
GLYMA_11G020000	-1.29351	0.000805549
GLYMA_11G021600	-2.11161	0.00922398
GLYMA_11G023800	-1.3903	0.0013616
GLYMA_11G024800	-1.74368	0.0132036
GLYMA_11G026700	-1.60504	0.00677219
GLYMA_11G031200	-1.58522	0.0263362
GLYMA_11G032600	-5.66428	0.00415207
GLYMA_11G032700	-1.02691	0.00092026
GLYMA_11G034600	-2.01989	0.0192897
GLYMA_11G038600	0.602789	0.0447754
GLYMA_11G039100	-2.15091	0.0103768
GLYMA_11G039300	2.10405	0.012575
GLYMA_11G043900	-4.23664	0.00329181
GLYMA_11G044200	-1.74075	0.0193501
GLYMA_11G044900	-2.99324	0.0248705
GLYMA_11G048000	-1.68715	0.00711303
GLYMA_11G050400	1.37574	0.0141901
GLYMA_11G050700	1.29097	0.0258096
GLYMA_11G057000	-5.27468	0.00672572
GLYMA_11G057100	2.81172	0.0462661
GLYMA_11G058400	0.896365	0.0462342
GLYMA_11G059500	-3.21965	0.0150911
GLYMA_11G059600	-1.79372	0.00641208
GLYMA_11G059800	-1.95032	0.00620581
GLYMA_11G061100	-1.87707	0.0454383
GLYMA_11G063000	-1.85672	0.0327971
GLYMA_11G068200	0.596331	0.0400153
GLYMA_11G068400	-4.06085	7.10188e-06
GLYMA_11G068500	-2.8551	0.00633756
GLYMA_11G068600	-3.81212	0.0045197
GLYMA_11G073000	-1.58412	0.0486296
GLYMA_11G073800	-1.71171	0.00371956
GLYMA_11G075900	-2.0544	0.0437396
GLYMA_11G077800	-1.53034	0.0277627
GLYMA_11G079200	0.994204	0.00968173
GLYMA_11G080300	0.643346	0.0447828
GLYMA_11G084100	0.816046	0.028668
GLYMA_11G084500	-2.13743	0.0142551
GLYMA_11G086000	-1.17489	0.000387386
GLYMA_11G090300	0.728225	0.0220525
GLYMA_11G094000	0.775579	0.0118822
GLYMA_11G097200	1.30346	0.00243903
GLYMA_11G098900	-1.49516	0.00352351
GLYMA_11G099100	-1.5572	0.00347816
GLYMA_11G099600	-1.21114	0.000406636
GLYMA_11G099700	-1.74878	0.000147724
GLYMA_11G100400	-1.24069	0.00047435
GLYMA_11G103600	-2.00544	0.0286069
GLYMA_11G105900	-2.48662	0.0446519
GLYMA_11G108400	0.871718	0.0445736
GLYMA_11G109200	-2.48208	0.0313548
GLYMA_11G109300	-3.18536	0.0169844
GLYMA_11G113200	0.70629	0.023056
GLYMA_11G113600	0.706207	0.0201521
GLYMA_11G113700	-1.04849	0.00177624
GLYMA_11G113800	0.862108	0.00478618
GLYMA_11G114000	-2.31909	0.0272425
GLYMA_11G115200	-2.12366	0.0254488
GLYMA_11G115800	1.84753	0.00160036
GLYMA_11G119600	-2.34104	3.97e-05
GLYMA_11G120300	-5.83956	0.00307137
GLYMA_11G120900	-1.23939	0.00777209
GLYMA_11G121700	-1.26345	0.0027106
GLYMA_11G124900	-4.516	0.0274429
GLYMA_11G125700	0.659116	0.0249681
GLYMA_11G127900	0.782265	0.0147363
GLYMA_11G130600	-3.96922	0.0412094
GLYMA_11G131800	-4.07156	0.00389306
GLYMA_11G138800	-1.42826	0.0295898
GLYMA_11G141200	-1.37705	0.000655273
GLYMA_11G141300	-2.42963	0.0424811
GLYMA_11G141400	-2.91367	0.0427212
GLYMA_11G141500	-1.29743	0.000474603
GLYMA_11G143000	0.898945	0.00361854
GLYMA_11G143100	-1.90862	0.00362951
GLYMA_11G166200	0.963428	0.00381139
GLYMA_11G167800	-1.26483	0.000131953
GLYMA_11G169300	-2.48388	0.00720183
GLYMA_11G170900	-2.53556	0.0456608
GLYMA_11G172400	-2.40849	0.00720184
GLYMA_11G178500	0.633844	0.0438714
GLYMA_11G201900	-3.67911	0.027182
GLYMA_11G234900	1.05394	0.0127298
GLYMA_11G238500	-4.49456	0.0182044
GLYMA_11G240000	-4.90423	0.012953
GLYMA_11G241400	0.754092	0.0390571
GLYMA_11G244600	3.67584	0.0389606
GLYMA_12G001200	0.59425	0.0466286
GLYMA_12G001300	-1.63149	0.00689153
GLYMA_12G003100	-1.26214	0.00249805
GLYMA_12G004300	-1.31672	0.00455771
GLYMA_12G009300	-1.33567	0.0141399
GLYMA_12G009800	-1.25227	0.00685311
GLYMA_12G014400	-2.0899	0.0267017
GLYMA_12G014600	-1.20886	0.00460541
GLYMA_12G017600	-2.5803	0.0144592
GLYMA_12G024600	0.736302	0.0324589
GLYMA_12G024900	-1.22332	0.000418303
GLYMA_12G026600	-1.44473	0.00134008
GLYMA_12G028400	-2.14392	0.0212416
GLYMA_12G029200	1.28827	0.000362373
GLYMA_12G039700	-1.65491	0.000693261
GLYMA_12G042200	2.64844	0.000591873
GLYMA_12G042600	1.78575	0.00834056
GLYMA_12G049100	-1.68387	0.042811
GLYMA_12G053700	-2.64542	0.0433815
GLYMA_12G054300	-4.97856	0.0180767
GLYMA_12G055000	-4.49005	0.012936
GLYMA_12G057600	-2.6138	0.0221644
GLYMA_12G062800	-1.70939	0.00315888
GLYMA_12G063100	0.71983	0.0342701
GLYMA_12G064200	-3.10757	0.0366836
GLYMA_12G064800	-3.18047	3.88035e-06
GLYMA_12G064900	-2.14399	0.0139665
GLYMA_12G065100	-3.13913	0.00236681
GLYMA_12G065700	-1.47608	0.0197457
GLYMA_12G066300	-1.97843	0.0222129
GLYMA_12G066400	-2.17203	0.0156702
GLYMA_12G068500	-2.58094	0.00022268
GLYMA_12G069800	-1.67582	0.00296646
GLYMA_12G069900	-2.65296	0.00144067
GLYMA_12G071300	0.770207	0.049532
GLYMA_12G072100	-2.63798	0.0152624
GLYMA_12G074000	-2.49355	0.00695955
GLYMA_12G074400	-3.4642	0.0173789
GLYMA_12G076100	-1.5214	0.0243658
GLYMA_12G076800	-1.3058	0.006643
GLYMA_12G077800	4.93697	0.00747541
GLYMA_12G078900	0.902911	0.00309022
GLYMA_12G082000	0.65425	0.046728
GLYMA_12G085600	0.778254	0.0308902
GLYMA_12G087000	0.972176	0.0130686
GLYMA_12G087200	0.962516	0.0246601
GLYMA_12G089300	0.693549	0.0332812
GLYMA_12G095400	-1.53486	0.000261915
GLYMA_12G096100	0.76319	0.0126533
GLYMA_12G106900	-1.26872	0.00143416
GLYMA_12G107600	0.75162	0.0190522
GLYMA_12G107900	-1.79141	0.0177721
GLYMA_12G113400	-1.08275	0.00553041
GLYMA_12G131400	-1.25889	0.0127297
GLYMA_12G136800	-2.84799	0.0136348
GLYMA_12G158100	-2.14691	0.0116101
GLYMA_12G168300	-3.01304	0.000611634
GLYMA_12G179700	-3.41104	0.0422466
GLYMA_12G191300	0.870529	0.0155368
GLYMA_12G191900	-2.45404	0.01368
GLYMA_12G194800	-3.2874	0.0215743
GLYMA_12G196500	-1.53767	0.00194917
GLYMA_12G199500	-1.79883	0.0295173
GLYMA_12G199900	-1.87148	0.00752969
GLYMA_12G205500	-1.06523	0.0143108
GLYMA_12G205800	0.598722	0.0384284
GLYMA_12G216100	-1.47472	0.0238014
GLYMA_12G217100	-2.05034	0.0291215
GLYMA_12G219100	-1.66335	0.000329571
GLYMA_12G220900	0.623988	0.0353119
GLYMA_12G224600	-1.44286	0.00768118
GLYMA_12G225100	0.746591	0.0490752
GLYMA_12G225400	-1.68059	0.0286213
GLYMA_12G225800	-1.93773	0.0445452
GLYMA_12G226000	-1.364	0.0408137
GLYMA_12G226300	1.91167	0.0301263
GLYMA_12G233400	-3.94942	0.000316173
GLYMA_12G234000	-1.13039	0.0174158
GLYMA_12G234200	0.657153	0.0331653
GLYMA_12G234600	-1.73464	0.0235917
GLYMA_12G236400	0.854525	0.0250397
GLYMA_12G238700	-5.48093	0.0340164
GLYMA_12G240000	-1.41936	0.000582177
GLYMA_12G240100	-1.30978	0.038712
GLYMA_13G001600	-6.96615	9.66921e-05
GLYMA_13G010100	-4.31333	0.000421418
GLYMA_13G018000	-2.02579	0.0468284
GLYMA_13G031500	-2.29556	0.0229167
GLYMA_13G034600	0.858054	0.0173066
GLYMA_13G036300	-4.13636	0.0424614
GLYMA_13G042800	-1.62175	0.026908
GLYMA_13G046600	-5.35918	0.00135494
GLYMA_13G048400	-2.16612	0.043228
GLYMA_13G049000	-1.51914	0.0313591
GLYMA_13G049900	-1.43496	0.000449864
GLYMA_13G055700	-1.94353	0.0299832
GLYMA_13G056800	0.798691	0.0240163
GLYMA_13G057300	0.658471	0.0485703
GLYMA_13G058100	1.17229	0.031679
GLYMA_13G060700	-1.05727	0.0217904
GLYMA_13G062700	0.989604	0.0124322
GLYMA_13G065500	-1.74574	0.0228929
GLYMA_13G082700	-1.68753	0.0452445
GLYMA_13G086200	0.62394	0.0314573
GLYMA_13G086300	0.605714	0.0396315
GLYMA_13G086500	2.74954	0.00767628
GLYMA_13G089200	1.24306	0.0166352
GLYMA_13G089800	0.757497	0.0191461
GLYMA_13G092300	-2.48973	0.000596934
GLYMA_13G092400	-1.86532	0.0156066
GLYMA_13G092700	-1.42339	0.0268254
GLYMA_13G093400	-1.60147	0.0135947
GLYMA_13G093900	-2.71732	0.0232628
GLYMA_13G094400	-2.9856	0.000208646
GLYMA_13G097800	-4.34348	0.0257928
GLYMA_13G101000	-1.11989	0.00775311
GLYMA_13G101700	0.744602	0.0216994
GLYMA_13G103300	-1.47514	0.0351396
GLYMA_13G106300	0.652069	0.0478845
GLYMA_13G106400	0.760811	0.0257278
GLYMA_13G107500	-1.24908	0.0418272
GLYMA_13G111000	-2.63339	0.0076445
GLYMA_13G113900	0.721391	0.0339691
GLYMA_13G115500	0.614747	0.0489509
GLYMA_13G117500	-1.53523	0.00141273
GLYMA_13G118100	0.946666	0.00195543
GLYMA_13G118600	0.783251	0.0273527
GLYMA_13G120800	0.735452	0.031697
GLYMA_13G121800	-1.81101	0.0393923
GLYMA_13G122600	-5.82869	0.00552866
GLYMA_13G123800	-3.05776	0.0164671
GLYMA_13G127400	-1.26455	0.0430201
GLYMA_13G127600	-1.53904	0.0346844
GLYMA_13G131600	-1.17983	0.0294104
GLYMA_13G132600	-1.85246	0.00104965
GLYMA_13G133600	-1.64645	0.0010265
GLYMA_13G137500	0.914185	0.00875849
GLYMA_13G138700	-3.25311	0.0287912
GLYMA_13G138900	-2.33633	0.021239
GLYMA_13G141500	-6.43619	0.000436497
GLYMA_13G142200	-2.52728	0.0172842
GLYMA_13G143600	-2.25142	0.0476003
GLYMA_13G147600	3.11959	0.00101285
GLYMA_13G151300	-2.20504	0.00165894
GLYMA_13G156200	-4.78422	0.03128
GLYMA_13G158000	-2.25517	0.0332776
GLYMA_13G164800	-1.55336	0.0250356
GLYMA_13G165500	0.681773	0.0466918
GLYMA_13G165600	0.765776	0.032401
GLYMA_13G165700	-2.33611	0.00286137
GLYMA_13G166600	-3.36351	0.018097
GLYMA_13G167300	-6.52421	0.00088649
GLYMA_13G167400	-5.80209	0.0401044
GLYMA_13G172000	-1.92584	0.0270472
GLYMA_13G178200	-5.45605	0.00877811
GLYMA_13G178400	-4.80815	0.00647981
GLYMA_13G179800	-3.11402	0.0119351
GLYMA_13G180600	-5.94158	0.00511648
GLYMA_13G180700	-5.43031	4.1177e-05
GLYMA_13G184300	-1.92283	0.00416371
GLYMA_13G186700	0.822167	0.0167373
GLYMA_13G187600	-2.45144	0.0285987
GLYMA_13G204800	2.0058	0.0237979
GLYMA_13G205600	0.917424	0.0148451
GLYMA_13G206100	-1.38934	0.0182551
GLYMA_13G210300	-1.7407	0.00985478
GLYMA_13G210400	-1.42215	0.0156256
GLYMA_13G214300	-1.67452	0.00140191
GLYMA_13G215400	-1.53875	0.000842993
GLYMA_13G218200	2.49145	0.022937
GLYMA_13G218300	-5.34785	0.0146163
GLYMA_13G224700	0.941002	0.00676008
GLYMA_13G226200	0.856108	0.037903
GLYMA_13G227100	-1.26198	0.0139638
GLYMA_13G228900	-1.05875	0.0314969
GLYMA_13G230000	-1.96082	0.0494656
GLYMA_13G230100	-1.84169	0.0279964
GLYMA_13G235200	1.70942	0.0119087
GLYMA_13G238200	-1.05593	0.015788
GLYMA_13G243000	-1.16712	0.0353264
GLYMA_13G245700	-1.4207	0.020355
GLYMA_13G250000	-3.62207	0.00859848
GLYMA_13G254200	0.924121	0.0307189
GLYMA_13G258800	0.657442	0.0431216
GLYMA_13G262000	-1.38813	0.00350263
GLYMA_13G262100	-1.16544	0.00401825
GLYMA_13G264300	-2.20309	0.0461598
GLYMA_13G265700	-1.42909	0.002756
GLYMA_13G265900	-1.47814	0.043854
GLYMA_13G268300	0.980064	0.0290327
GLYMA_13G269700	-2.7363	0.0217684
GLYMA_13G274200	-1.11845	0.0379546
GLYMA_13G274800	-1.99892	0.00494693
GLYMA_13G277100	-1.99125	0.0287656
GLYMA_13G282800	-1.40155	0.0292843
GLYMA_13G283600	-2.08406	0.00525936
GLYMA_13G287400	0.868782	0.00651317
GLYMA_13G289100	-1.58267	0.00326925
GLYMA_13G291500	-2.63236	0.040459
GLYMA_13G292100	0.793015	0.0191698
GLYMA_13G292200	0.760375	0.0261261
GLYMA_13G293900	0.705805	0.0452996
GLYMA_13G294900	-3.69967	0.000668648
GLYMA_13G295500	-1.64538	0.0496744
GLYMA_13G297200	-3.38689	0.00452155
GLYMA_13G298100	1.16654	0.00107055
GLYMA_13G299900	0.613004	0.0384071
GLYMA_13G301400	-4.26264	8.75091e-05
GLYMA_13G302800	0.858804	0.00661229
GLYMA_13G303700	0.606738	0.0481565
GLYMA_13G306000	-3.13886	0.00840576
GLYMA_13G309200	-1.56654	0.000960411
GLYMA_13G310900	-1.19383	0.0193914
GLYMA_13G316400	0.650595	0.0262665
GLYMA_13G320900	1.46092	0.0156119
GLYMA_13G322800	-5.30335	0.00990944
GLYMA_13G323800	-1.28235	0.038838
GLYMA_13G325400	-2.49706	0.0245592
GLYMA_13G326400	-1.42159	0.00230189
GLYMA_13G326500	-1.68632	0.00219816
GLYMA_13G330200	-2.00116	0.00610184
GLYMA_13G330900	-1.37494	0.00840125
GLYMA_13G336500	-2.5967	0.0212755
GLYMA_13G339900	0.622964	0.0454674
GLYMA_13G342300	-1.40692	0.0346332
GLYMA_13G343500	-1.51733	0.00026067
GLYMA_13G343700	2.68373	0.042968
GLYMA_13G349500	0.895592	0.0236642
GLYMA_13G349600	-2.02903	0.0380351
GLYMA_13G350800	-1.01013	0.0254167
GLYMA_13G351800	3.30472	0.0258862
GLYMA_13G352500	-1.03232	0.038654
GLYMA_13G355300	-1.3263	0.0397412
GLYMA_13G355800	-1.99158	0.0237061
GLYMA_13G356100	-3.14832	0.000654699
GLYMA_13G356400	-2.52566	5.44946e-06
GLYMA_13G356500	-1.87734	0.00415441
GLYMA_13G360000	0.950804	0.0473455
GLYMA_13G361900	-1.44208	0.00172478
GLYMA_13G362600	-1.1308	0.0402973
GLYMA_13G364500	0.809369	0.0462131
GLYMA_14G001400	0.655707	0.025136
GLYMA_14G003300	-1.18785	0.00094475
GLYMA_14G003900	-2.62312	0.0184126
GLYMA_14G005500	-4.65727	0.0113149
GLYMA_14G006000	-1.30179	0.000146536
GLYMA_14G006500	-3.40039	0.000167299
GLYMA_14G008500	-1.45401	0.00101845
GLYMA_14G009200	-5.89126	0.00837156
GLYMA_14G010300	-1.19199	0.0359028
GLYMA_14G011300	-1.79403	0.0435791
GLYMA_14G011600	-1.22166	0.000469219
GLYMA_14G014200	-2.79411	0.00204258
GLYMA_14G018100	-4.01682	0.0167446
GLYMA_14G022500	3.3438	0.0162405
GLYMA_14G022700	-1.78557	0.0338647
GLYMA_14G027800	-1.71596	0.0393568
GLYMA_14G029100	2.83683	0.00636513
GLYMA_14G029700	-1.28391	0.0104154
GLYMA_14G029800	-1.43354	0.00216325
GLYMA_14G030100	-1.24634	0.00290664
GLYMA_14G030400	-1.76088	0.00575626
GLYMA_14G031900	-3.24332	0.0186556
GLYMA_14G033300	-1.66061	0.0022488
GLYMA_14G033400	-1.9392	0.0479833
GLYMA_14G033900	-1.66493	0.0126189
GLYMA_14G034200	1.87237	0.025671
GLYMA_14G039000	0.97726	0.00315632
GLYMA_14G043300	0.739441	0.0127125
GLYMA_14G043400	0.991091	0.00983845
GLYMA_14G043900	0.916933	0.0123124
GLYMA_14G047400	-1.23662	0.0158517
GLYMA_14G051500	-3.23928	0.0328408
GLYMA_14G055600	-1.50867	0.0212402
GLYMA_14G055800	-4.98183	0.00881015
GLYMA_14G057400	2.13319	0.0384956
GLYMA_14G057800	4.42051	0.0160283
GLYMA_14G058900	-2.33925	0.00600817
GLYMA_14G059700	-1.85345	0.0195045
GLYMA_14G060000	-1.62767	0.00591377
GLYMA_14G060500	-1.11571	0.000749772
GLYMA_14G061800	-1.36342	0.0419646
GLYMA_14G063900	-4.28536	0.00401381
GLYMA_14G064600	-1.06011	0.00854032
GLYMA_14G065100	-2.1467	0.00265805
GLYMA_14G065600	0.78674	0.0275271
GLYMA_14G065800	-5.75916	0.00540062
GLYMA_14G069400	1.56378	0.0297955
GLYMA_14G069500	1.79855	0.00700855
GLYMA_14G073300	1.12637	0.0355625
GLYMA_14G077500	-2.33308	0.0256914
GLYMA_14G078200	-2.76215	0.000485592
GLYMA_14G078600	-3.08973	0.0317681
GLYMA_14G079800	0.972283	0.0129727
GLYMA_14G085300	-1.83934	0.0129556
GLYMA_14G087900	-2.20229	0.0425615
GLYMA_14G090000	-1.35069	0.00532554
GLYMA_14G091500	-3.52547	2.89532e-06
GLYMA_14G095700	0.727443	0.0243024
GLYMA_14G096600	0.645653	0.0299915
GLYMA_14G097000	-1.05307	0.00874046
GLYMA_14G103500	0.92718	0.00278068
GLYMA_14G148700	0.903667	0.00686837
GLYMA_14G158200	-2.10529	0.041387
GLYMA_14G174700	-1.47466	0.0352449
GLYMA_14G188900	-1.59805	0.0477302
GLYMA_14G191500	-1.1412	0.0389017
GLYMA_14G192000	0.656738	0.0249267
GLYMA_14G196300	-1.12737	0.000650678
GLYMA_14G196800	-1.3957	8.02345e-05
GLYMA_14G197000	0.889234	0.00441163
GLYMA_14G201700	0.739599	0.0386662
GLYMA_14G205000	0.996893	0.00155286
GLYMA_14G208100	0.8317	0.0413497
GLYMA_14G208400	-1.13441	0.00418605
GLYMA_14G211800	-3.33276	0.000362038
GLYMA_14G218400	-1.45395	0.0326977
GLYMA_14G219900	0.707408	0.0255962
GLYMA_14G221400	-4.09692	0.0440503
GLYMA_14G222500	-2.38833	0.0262213
GLYMA_14G223100	-2.74712	0.0266165
GLYMA_15G000400	0.99789	0.0403069
GLYMA_15G003000	-1.13813	0.0426389
GLYMA_15G003500	-1.36107	0.00636018
GLYMA_15G003700	-2.43759	0.0289385
GLYMA_15G005400	0.744461	0.0201545
GLYMA_15G007700	0.707274	0.0193428
GLYMA_15G008800	-1.26096	0.00333814
GLYMA_15G008900	-1.80525	0.00194557
GLYMA_15G011600	-2.38617	0.0301478
GLYMA_15G011800	-5.7787	0.00522871
GLYMA_15G012400	-3.3183	0.0392622
GLYMA_15G013200	0.824856	0.0335015
GLYMA_15G013600	0.720202	0.0170125
GLYMA_15G015500	-2.10581	0.007819
GLYMA_15G022000	-5.66541	0.00525877
GLYMA_15G022500	0.650951	0.0469306
GLYMA_15G022700	-2.20892	0.0110325
GLYMA_15G023500	4.81345	0.0216733
GLYMA_15G026100	0.647498	0.0278961
GLYMA_15G028100	-1.3939	5.90183e-05
GLYMA_15G028200	-1.73153	0.00421542
GLYMA_15G028700	-1.59165	0.000156993
GLYMA_15G037700	-4.50564	0.0187629
GLYMA_15G039400	-1.99674	0.00571538
GLYMA_15G040100	-1.8921	0.00263417
GLYMA_15G040200	-1.15609	0.00191768
GLYMA_15G040300	-1.0884	0.000871987
GLYMA_15G041400	-1.439	0.0153419
GLYMA_15G042900	-1.65628	0.000106593
GLYMA_15G043200	-1.41761	0.000124607
GLYMA_15G049200	0.987625	0.0330282
GLYMA_15G049500	-3.81675	0.00140844
GLYMA_15G055800	-2.57919	0.0318251
GLYMA_15G056200	1.50541	0.0332542
GLYMA_15G056400	0.654704	0.0483891
GLYMA_15G057700	5.72996	0.00292551
GLYMA_15G059100	-2.11776	0.0289308
GLYMA_15G062100	-1.25796	0.0191364
GLYMA_15G063100	-1.32928	0.000354273
GLYMA_15G068100	-1.46705	0.000521169
GLYMA_15G071300	0.791609	0.0165412
GLYMA_15G073200	-1.25845	0.0222079
GLYMA_15G073300	-1.25597	0.00369148
GLYMA_15G077100	0.737419	0.0210352
GLYMA_15G079300	-1.89185	0.000547875
GLYMA_15G081400	-4.61199	0.0141996
GLYMA_15G089300	-1.40438	0.0150374
GLYMA_15G090400	-1.65063	0.000383024
GLYMA_15G092600	-1.19903	0.0101449
GLYMA_15G093800	-5.68448	0.0144129
GLYMA_15G095000	-1.4505	0.00743227
GLYMA_15G097100	0.69019	0.0387902
GLYMA_15G099400	0.653879	0.0341562
GLYMA_15G101100	0.730488	0.0219289
GLYMA_15G102300	-1.58451	9.76391e-05
GLYMA_15G106200	0.621286	0.0366261
GLYMA_15G108900	0.839817	0.0319661
GLYMA_15G109300	-1.00612	0.0352583
GLYMA_15G111400	-1.21435	0.0218182
GLYMA_15G111500	-2.20818	0.0302416
GLYMA_15G112700	-1.17985	0.019534
GLYMA_15G113700	-2.87688	0.00516813
GLYMA_15G115100	0.87538	0.0489242
GLYMA_15G116400	-5.28339	0.00745971
GLYMA_15G118300	-1.39867	0.0270507
GLYMA_15G121400	-1.62133	0.0446182
GLYMA_15G123000	1.36117	0.0126189
GLYMA_15G123900	0.782406	0.00782545
GLYMA_15G127100	0.732083	0.0226926
GLYMA_15G128200	1.15133	0.0125116
GLYMA_15G129100	0.887294	0.00942515
GLYMA_15G129300	-1.3281	0.0340098
GLYMA_15G130300	0.927657	0.00568729
GLYMA_15G130700	-5.8172	0.00214717
GLYMA_15G130800	0.912664	0.00583138
GLYMA_15G134100	-1.26358	0.00280828
GLYMA_15G136000	-1.20309	0.00317544
GLYMA_15G139800	0.724586	0.0213791
GLYMA_15G144500	4.48246	0.00880614
GLYMA_15G147500	-1.90516	0.00292954
GLYMA_15G151500	-4.77448	0.0269735
GLYMA_15G152100	1.17071	0.0344705
GLYMA_15G152200	0.721199	0.029375
GLYMA_15G153400	-1.29176	0.0419878
GLYMA_15G154700	-2.43266	0.0314377
GLYMA_15G156900	-1.09705	0.0372963
GLYMA_15G162400	-2.17593	0.00109357
GLYMA_15G163700	0.68372	0.0276011
GLYMA_15G164000	-1.23515	0.041694
GLYMA_15G178600	-2.18093	0.0265179
GLYMA_15G183400	-4.49866	0.0269933
GLYMA_15G197800	-1.67512	0.00240883
GLYMA_15G210900	-2.46453	0.00669097
GLYMA_15G213200	0.990067	0.0439733
GLYMA_15G237800	-3.25385	0.041181
GLYMA_15G250700	-1.06953	0.00395405
GLYMA_15G261000	0.656253	0.0428073
GLYMA_15G264900	-4.08913	0.0252599
GLYMA_15G265300	0.935056	0.00557114
GLYMA_15G266100	-1.3984	0.0166573
GLYMA_15G266800	-3.18633	0.0294478
GLYMA_15G267200	-1.1818	0.000530504
GLYMA_15G267700	-2.4022	0.00182955
GLYMA_15G267800	-1.12611	0.000358257
GLYMA_15G268400	-1.91302	0.00940759
GLYMA_15G269900	2.95337	0.0458385
GLYMA_16G000200	0.599836	0.0411042
GLYMA_16G001900	-1.41181	0.00343148
GLYMA_16G005900	-1.14408	0.00329013
GLYMA_16G007400	-5.61999	0.0241645
GLYMA_16G010200	0.844864	0.0432054
GLYMA_16G010500	-2.19376	0.00375115
GLYMA_16G012200	-2.00134	0.0428791
GLYMA_16G013700	-6.15854	0.00198015
GLYMA_16G016000	-2.06305	0.0385153
GLYMA_16G017600	-5.83204	0.0104136
GLYMA_16G017800	0.853243	0.0117208
GLYMA_16G019500	-2.93141	0.0489774
GLYMA_16G025900	-4.03825	0.000634
GLYMA_16G026500	0.731904	0.028976
GLYMA_16G027700	-3.02312	0.0192956
GLYMA_16G028200	-3.21052	0.0153301
GLYMA_16G028400	-2.31863	0.034216
GLYMA_16G028600	-2.21354	0.0127591
GLYMA_16G031100	0.902313	0.0311721
GLYMA_16G031800	-1.50937	0.0333032
GLYMA_16G034200	-1.60789	0.00622187
GLYMA_16G036100	-1.05477	0.0250132
GLYMA_16G036800	-1.58816	0.0268938
GLYMA_16G041200	-3.42178	0.0239439
GLYMA_16G042100	-1.13963	0.026719
GLYMA_16G042200	-1.48177	0.00162364
GLYMA_16G044500	-4.95388	0.0230864
GLYMA_16G046200	-4.13348	0.0239536
GLYMA_16G048900	-1.87093	0.048014
GLYMA_16G049400	1.29757	0.00504919
GLYMA_16G049600	-1.07329	0.00131125
GLYMA_16G057600	-1.47549	0.00687345
GLYMA_16G066200	-1.46445	0.0382576
GLYMA_16G067800	-4.53334	0.0344444
GLYMA_16G072700	-2.00785	0.000937335
GLYMA_16G073600	-2.41368	0.02776
GLYMA_16G077300	-2.20583	0.0473424
GLYMA_16G077600	-2.22107	0.0368014
GLYMA_16G078100	-2.16883	0.0110258
GLYMA_16G098700	-2.28122	0.0218353
GLYMA_16G104700	-1.16191	0.0125262
GLYMA_16G108200	0.820736	0.0143239
GLYMA_16G125200	-2.75335	0.000297879
GLYMA_16G127700	-5.73917	0.00792497
GLYMA_16G129200	-1.61068	0.00175836
GLYMA_16G133400	-3.9539	0.00078669
GLYMA_16G134700	-2.15246	0.0352774
GLYMA_16G141100	-3.36103	0.00258426
GLYMA_16G144500	-2.6195	0.000938148
GLYMA_16G146700	-1.86558	0.0364988
GLYMA_16G150200	3.98304	0.0252201
GLYMA_16G150600	-1.97729	0.0118107
GLYMA_16G151500	4.88301	0.0425761
GLYMA_16G154700	-4.55655	0.0147613
GLYMA_16G155200	-3.52143	0.00631235
GLYMA_16G155400	-1.24876	0.00930093
GLYMA_16G155500	0.912764	0.0241751
GLYMA_16G156900	0.984812	0.00697028
GLYMA_16G157900	-1.88154	0.0219102
GLYMA_16G158300	-2.04985	0.0180311
GLYMA_16G160200	-3.2099	0.0200357
GLYMA_16G163300	-3.23677	0.00253109
GLYMA_16G169600	0.846135	0.00818713
GLYMA_16G171100	-1.31159	0.0116909
GLYMA_16G174300	-2.50682	0.0486764
GLYMA_16G174400	-2.35432	0.0183801
GLYMA_16G180100	-1.20059	0.0143691
GLYMA_16G181300	-5.28741	0.0142062
GLYMA_16G181400	0.831488	0.0431794
GLYMA_16G197500	-5.80729	0.00194977
GLYMA_16G197700	-2.29081	0.0080251
GLYMA_16G206300	-3.24452	0.0266245
GLYMA_16G206500	-1.55096	0.0495965
GLYMA_16G207100	-2.00516	0.000928236
GLYMA_16G208400	-6.04128	0.000461179
GLYMA_16G209000	-1.57469	3.33845e-05
GLYMA_16G209400	-1.7409	0.0164614
GLYMA_16G210200	-1.6967	2.82495e-05
GLYMA_16G211400	0.652491	0.0421455
GLYMA_16G213800	-1.01049	0.0160016
GLYMA_16G215100	-5.42353	0.00346521
GLYMA_17G001300	-3.38628	0.0235228
GLYMA_17G004300	-1.61198	0.000313854
GLYMA_17G005000	0.816931	0.029278
GLYMA_17G005900	4.53274	0.00742993
GLYMA_17G006000	-1.92931	0.00167973
GLYMA_17G006100	-2.32007	0.00826246
GLYMA_17G008000	0.785281	0.0135187
GLYMA_17G009700	-1.42244	0.000427394
GLYMA_17G010500	0.586582	0.044865
GLYMA_17G012200	-3.47107	0.0289562
GLYMA_17G012900	1.53179	0.0304457
GLYMA_17G014000	-5.79926	0.00107373
GLYMA_17G014900	0.959625	0.0493294
GLYMA_17G015600	-5.10591	0.0176795
GLYMA_17G018200	0.735142	0.027265
GLYMA_17G018600	-2.19482	0.0265371
GLYMA_17G020600	0.921728	0.010355
GLYMA_17G020700	-1.11931	0.00215063
GLYMA_17G021700	0.928986	0.00401787
GLYMA_17G022800	-1.39618	0.0465833
GLYMA_17G023200	-1.28372	0.00184838
GLYMA_17G023300	-1.09716	0.00682271
GLYMA_17G027500	-3.61123	0.000126217
GLYMA_17G029500	-1.18261	0.0319299
GLYMA_17G029800	-2.64058	0.00521783
GLYMA_17G031800	-1.155	0.0250686
GLYMA_17G033100	-1.06548	0.0155326
GLYMA_17G033200	-1.80403	0.0499509
GLYMA_17G034000	1.38814	0.00214025
GLYMA_17G036500	-1.77841	0.0131586
GLYMA_17G037000	-1.30018	0.0213111
GLYMA_17G037400	0.744995	0.0157467
GLYMA_17G037500	-2.70982	0.00798886
GLYMA_17G038600	-3.92313	0.00327631
GLYMA_17G041200	-2.04565	0.0100967
GLYMA_17G045600	0.682575	0.0286624
GLYMA_17G046400	-2.10046	0.000879257
GLYMA_17G048700	-4.26223	0.0102723
GLYMA_17G051400	4.80494	0.0217519
GLYMA_17G051900	0.634262	0.0415733
GLYMA_17G053300	0.983799	0.0477249
GLYMA_17G053900	-1.46426	0.0121589
GLYMA_17G054400	-2.14233	0.00982787
GLYMA_17G054500	-2.2434	0.0135635
GLYMA_17G055100	0.934432	0.0148935
GLYMA_17G055400	-1.84223	0.005904
GLYMA_17G057300	-1.50327	0.00681159
GLYMA_17G057400	-1.74866	0.0054105
GLYMA_17G058400	-1.91284	0.0155483
GLYMA_17G058600	-1.56401	0.0122278
GLYMA_17G060700	-1.56655	0.00739284
GLYMA_17G061500	0.741368	0.0236471
GLYMA_17G061900	-1.36084	0.0118284
GLYMA_17G062300	-3.2246	0.000990064
GLYMA_17G062400	-1.35682	0.00813057
GLYMA_17G062600	-2.40057	0.0273925
GLYMA_17G067400	0.680659	0.0243559
GLYMA_17G069800	-1.15314	0.011983
GLYMA_17G072000	-1.41864	0.0337611
GLYMA_17G074200	0.95895	0.00389457
GLYMA_17G074500	0.915676	0.0153965
GLYMA_17G076700	-1.12042	0.00782743
GLYMA_17G078400	-2.81495	0.0441266
GLYMA_17G078500	-1.8678	0.0434524
GLYMA_17G078800	-1.84226	0.00524993
GLYMA_17G082000	0.633985	0.0361821
GLYMA_17G083800	0.753084	0.0138609
GLYMA_17G085400	-1.27349	0.00113789
GLYMA_17G088200	-2.75327	0.0257585
GLYMA_17G088500	-2.48185	0.0450583
GLYMA_17G088800	-4.3516	0.00283928
GLYMA_17G090100	-1.02064	0.0154658
GLYMA_17G092100	2.02744	0.0197935
GLYMA_17G092600	0.760891	0.0156816
GLYMA_17G092900	0.71699	0.0465035
GLYMA_17G093300	-2.49635	0.0122082
GLYMA_17G093600	-1.64538	0.039989
GLYMA_17G094500	-4.00224	0.041542
GLYMA_17G096500	-1.56313	0.00983486
GLYMA_17G097700	-1.16716	0.0183273
GLYMA_17G098300	-2.8815	0.0452552
GLYMA_17G098600	-2.8098	0.0187793
GLYMA_17G099200	-2.15973	0.0489709
GLYMA_17G099500	-4.71009	0.0180369
GLYMA_17G103500	-1.53382	0.00223528
GLYMA_17G103600	-1.22262	0.0204434
GLYMA_17G103800	-1.37345	0.0135132
GLYMA_17G103900	-3.91958	0.000792702
GLYMA_17G104000	-1.63149	0.00262971
GLYMA_17G109800	4.55953	0.0313191
GLYMA_17G110400	3.91558	0.0430436
GLYMA_17G110600	0.850779	0.0438266
GLYMA_17G112700	0.990496	0.0288002
GLYMA_17G113000	2.45705	0.0431388
GLYMA_17G113900	0.645618	0.0339128
GLYMA_17G115400	-1.16299	0.00286498
GLYMA_17G115500	-1.02187	0.00903813
GLYMA_17G115600	-1.79453	0.026032
GLYMA_17G117800	-2.44612	0.0199611
GLYMA_17G120100	-5.60394	0.00913932
GLYMA_17G123100	-2.80641	0.0165696
GLYMA_17G123800	0.784502	0.0193521
GLYMA_17G128400	-1.3888	0.0288331
GLYMA_17G129300	0.667014	0.044835
GLYMA_17G130700	-2.16398	0.00106086
GLYMA_17G131200	-2.10593	0.00411185
GLYMA_17G131300	-2.10741	0.00020617
GLYMA_17G133400	0.937224	0.00612963
GLYMA_17G134500	-1.62755	0.00645
GLYMA_17G137800	4.13871	0.030853
GLYMA_17G141800	-3.0796	0.0335487
GLYMA_17G142800	-1.48877	0.000129971
GLYMA_17G142900	-1.09051	0.0023265
GLYMA_17G143500	-1.77922	0.00139742
GLYMA_17G147300	-1.48059	0.0193676
GLYMA_17G149100	-1.12275	0.000802182
GLYMA_17G155700	-3.07405	0.000512099
GLYMA_17G160400	0.769547	0.0236517
GLYMA_17G160500	-1.66743	0.000736457
GLYMA_17G164100	-5.11178	0.00795893
GLYMA_17G165700	0.995938	0.0389726
GLYMA_17G166000	-2.42202	0.0182502
GLYMA_17G186600	-2.20491	0.0238087
GLYMA_17G196300	0.717188	0.0468979
GLYMA_17G201000	0.743187	0.0179325
GLYMA_17G201600	-3.59414	0.000796013
GLYMA_17G216200	-1.53155	0.045943
GLYMA_17G221100	-1.16428	0.0491574
GLYMA_17G222300	-1.49988	0.0424341
GLYMA_17G223500	-3.06191	0.00994376
GLYMA_17G226100	0.630928	0.0342962
GLYMA_17G228600	0.758705	0.0111471
GLYMA_17G233600	-1.09633	0.0387102
GLYMA_17G235100	-3.24014	0.0215142
GLYMA_17G236400	-1.1018	0.00623803
GLYMA_17G238300	-2.62747	0.0236373
GLYMA_17G238400	-6.7291	0.00418537
GLYMA_17G239600	0.916859	0.0171934
GLYMA_17G247000	-1.48849	0.0386718
GLYMA_17G248400	0.746999	0.0316454
GLYMA_17G250700	0.77639	0.0225299
GLYMA_17G250800	4.19791	0.0286736
GLYMA_17G254500	1.04956	0.0132666
GLYMA_17G256900	-1.40673	0.00386735
GLYMA_17G259200	0.819113	0.0074309
GLYMA_17G262000	0.599921	0.0485303
GLYMA_18G002100	-5.40239	0.00337896
GLYMA_18G002400	0.757058	0.0273026
GLYMA_18G003200	1.09073	0.000579701
GLYMA_18G005800	-5.35939	0.0408776
GLYMA_18G006500	-3.1545	0.0320432
GLYMA_18G007500	-2.26555	0.0138589
GLYMA_18G008100	-1.5149	0.000797606
GLYMA_18G009300	-7.56789	0.000259065
GLYMA_18G009700	-1.52918	0.0260968
GLYMA_18G010300	-1.45546	0.0185088
GLYMA_18G011900	-1.60552	0.0130707
GLYMA_18G012400	-1.03151	0.00376746
GLYMA_18G013300	-1.15606	0.0420204
GLYMA_18G014500	3.84537	0.0341332
GLYMA_18G015800	-1.33724	0.0231011
GLYMA_18G016000	-1.2953	0.00222313
GLYMA_18G016200	-1.24928	0.0182216
GLYMA_18G017100	-1.70886	0.00660088
GLYMA_18G017200	-2.27507	0.0201175
GLYMA_18G019600	0.847915	0.00514706
GLYMA_18G022700	-1.06612	0.000948671
GLYMA_18G024800	0.894437	0.0072531
GLYMA_18G026100	-2.73894	0.0250483
GLYMA_18G030500	-4.06837	0.000976157
GLYMA_18G030600	-2.70993	0.0201939
GLYMA_18G032000	-3.55207	0.00855865
GLYMA_18G034700	0.594982	0.0411777
GLYMA_18G035100	-1.96279	0.00334757
GLYMA_18G038600	0.837831	0.019505
GLYMA_18G039300	1.17942	0.00294436
GLYMA_18G042300	0.983055	0.0157453
GLYMA_18G043600	-2.37828	0.00521809
GLYMA_18G044300	-1.47743	0.032605
GLYMA_18G053700	0.978121	0.00674755
GLYMA_18G055200	-2.5873	0.0091543
GLYMA_18G055300	-6.33262	0.0229946
GLYMA_18G057200	-1.22911	0.0244237
[truncated: 296 more rows]
