# Supplementary material for: Elicitation of Roots and AC-DC with PEP-13 Peptide Shows Differential Defense Responses in Multi-Omics
Source: Cells. 2022 Aug 21;11(16):2605. doi: 10.3390/cells11162605 (PMC9406913; doi:10.3390/cells11162605)
Supplement: Supplementary file 1 [file cells-11-02605-s001.zip › 220720 Data supp.pdf]

**Table S1:** Cell wall over-expressed genes and proteins in AC-DC compared to roots in control condition, related to figure 2.  
 See excel file, sheet “Table S1”. The column “Bin name” corresponds to gene ontologies obtained with Mapman. ID = identifier. Bold identifiers correspond to proteins. (fold change  $\geq 1,5$ ; p-value  $\leq 0,05$ )

**Table S2:** Differentially expressed genes and proteins upon PEP13 elicitation in roots, related to figure 3.  
 See excel file, sheet “Roots E vs NE”. (fold change  $\geq 1,5$ ; p-value  $\leq 0,05$ )

**Table S3:** Differentially expressed genes and proteins upon PEP13 elicitation in AC-DC, related to figure 3.  
 See excel file, sheet “AC-DC E vs NE”. (fold change  $\geq 1,5$ ; p-value  $\leq 0,05$ )

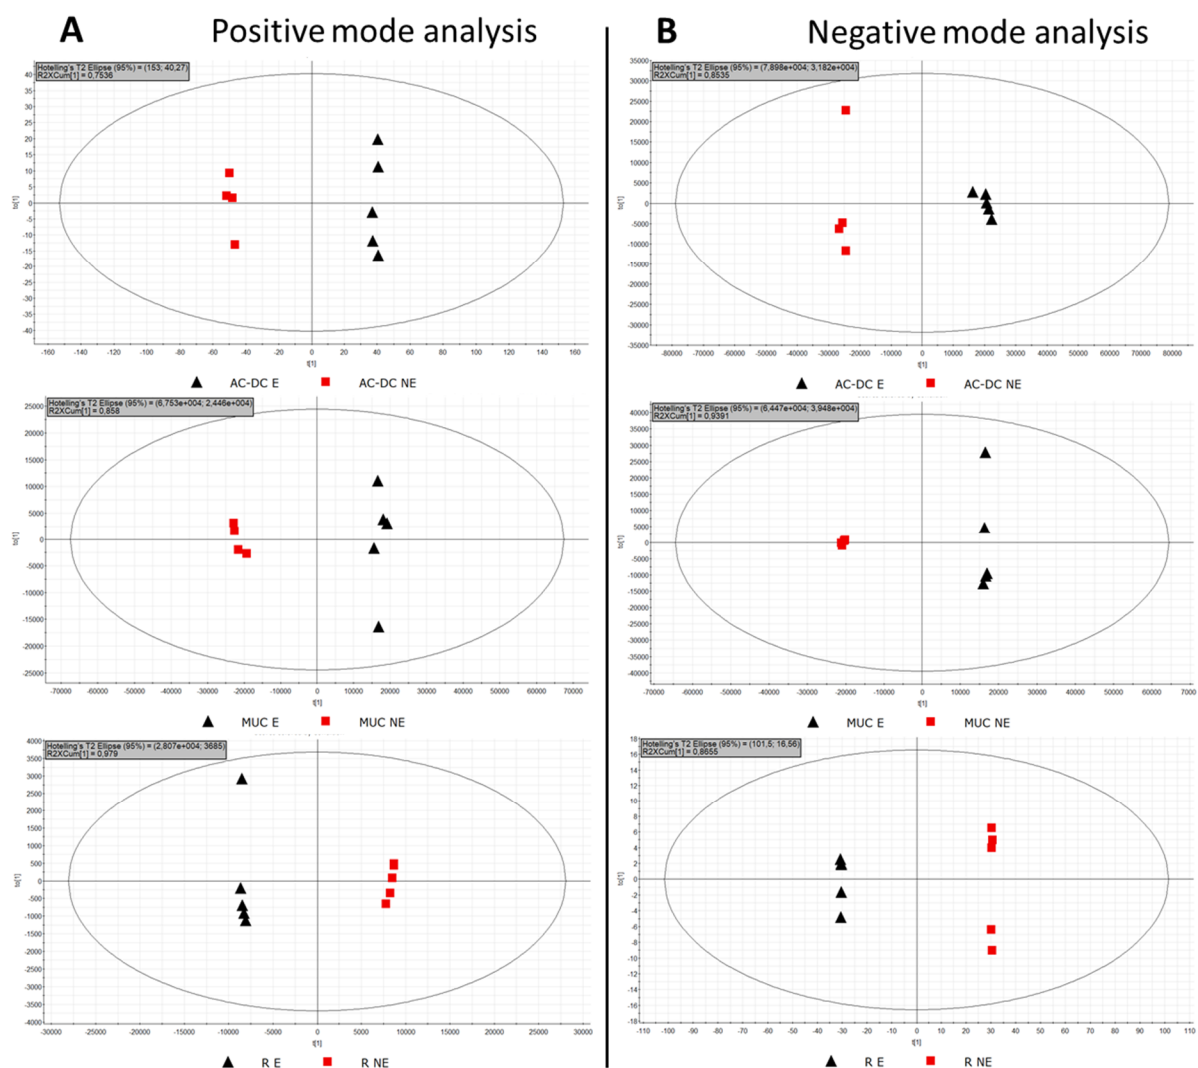

**Figure S1:** Supervised multivariate classification OPLS-DA of AC-DC, mucilage and roots with and without PEP-13 elicitation, related to metabolomic analysis.  
 R =roots; MUC = mucilage; AC-DC = root Associated Cap-Derived Cells.
